# Supplementary material for: Activating the neutral pH photozymatic activity of g-C3N4 nanosheets through post-synthetic incorporation of Pt
Source: Royal Society of Chemistry journal article supplement (doi:10.1039/d2cc01512a), 2022-01-01
Supplement: d2cc01512a1.pdf [file d2cc01512a1.pdf]

## Electronic Supplementary Information

### Activating the Neutral pH Photozymatic Activity of g-C<sub>3</sub>N<sub>4</sub> Nanosheet through Post-Synthetic Incorporation of Pt

Xue Li,<sup>a</sup> Xianming Li,<sup>a</sup> Qian Chen,<sup>a</sup> Junbo Chen,<sup>\*,a</sup> Peng Wu<sup>\*, a, b</sup>

<sup>a</sup> Analytical & Testing Center, State Key Laboratory of Hydraulics and Mountain River Engineering, Sichuan University, Chengdu 610064, China

<sup>b</sup> School of Chemistry and Chemical Engineering, Henan Normal University, Xinxiang, 453007, China.

**\*Corresponding authors' E-mail:** junbochen@scu.edu.cn (Junbo Chen),  
wupeng@scu.edu.cn (Peng Wu)

## Table of Contents

|                                                                                       |    |
|---------------------------------------------------------------------------------------|----|
| Section 1. Experimental Section .....                                                 | 3  |
| 1.1 Reagents .....                                                                    | 3  |
| 1.2 Instruments .....                                                                 | 4  |
| 1.3 Synthesis of Pt@CNNS .....                                                        | 4  |
| 1.4 Photozymatic activity and steady-state kinetic analysis of CNNS and Pt@CNNS ..... | 5  |
| 1.5 Absorption of Pt@CNNS and CNNS with TMB .....                                     | 6  |
| 1.6 ROS characterization .....                                                        | 6  |
| 1.7 Assessing the antioxidants in alleviating photozymatic activity .....             | 7  |
| 1.8 Evaluation antioxidants capacities in tea samples at neutral pH .....             | 7  |
| Section 2. Materials characterizations .....                                          | 8  |
| Section 3. Photozymatic activity of Pt@CNNS .....                                     | 13 |
| Section 4. Enzymatic kinetics of Pt@CNNS .....                                        | 19 |
| Section 5. ROS generation from Pt@CNNS .....                                          | 21 |
| Section 6. Colorimetric Determination of Antioxidants .....                           | 25 |
| Section 7. Evaluation of Antioxidants in Tea samples .....                            | 31 |
| References .....                                                                      | 39 |

## Section 1. Experimental Section

### 1.1 Reagents

The detailed information of the reagents was given in Table S1.

**Table S1.** The Reagent information in this work.

| Name                                                | CAS No.    | Specification | Supplier                       |
|-----------------------------------------------------|------------|---------------|--------------------------------|
| H <sub>2</sub> PtCl <sub>6</sub> ·6H <sub>2</sub> O | 18497-13-7 | ACS           | Sigma-Aldrich, Shanghai, China |
| Folin & Ciocalteu reagent (2 N)                     | /          | /             | Sigma-Aldrich, Shanghai, China |
| Carbon nitride ethanol-water dispersion             | /          | /             | XFNANO, Nanjing, China         |
| 3, 3', 5, 5'-tetramethylbenzidine                   | 54827-17-7 | 98%           | Aladdin, Shanghai, China       |
| Dimethyl sulfoxide                                  | 67-68-5    | ≥ 99.8%       | Aladdin, Shanghai, China       |
| (-)-Epigallocatechin gallate                        | 989-51-5   | 98%           | Aladdin, Shanghai, China       |
| (±)-Catechin hydrate (CT)                           | 7295-85-4  | 96%           | Aladdin, Shanghai, China       |
| Rutin (RT)                                          | 153-18-4   | 95%           | Aladdin, Shanghai, China       |
| Quercetin (QR)                                      | 117-39-5   | 95%           | Aladdin, Shanghai, China       |
| Ascorbic acid (AA)                                  | 89924-69-6 | ≥ 99.7%       | Kelong, Chengdu, China         |
| Caffeic acid (CA)                                   | 331-39-5   | 98%           | Aladdin, Shanghai, China       |
| Chlorogenic acid (CHA)                              | 327-97-9   | 98%           | Aladdin, Shanghai, China       |
| Gallic acid (GA)                                    | 149-91-7   | 99%           | Aladdin, Shanghai, China       |
| HAuCl <sub>4</sub>                                  | 16961-25-4 | 99.9%         | Aladdin, Shanghai, China       |
| K <sub>2</sub> PdCl <sub>6</sub>                    | 16919-73-6 | ≥26.3% (Pd)   | Aladdin, Shanghai, China       |

Ultra-pure water obtained from a Millipore water purification system (≥18.2 MΩ, Milli-Q, Millipore) was used throughout this work.

## 1.2 Instruments

All the instrumental information used for characterizations were given in Table S1.

**Table S2.** The instrumental information used in this work.

| Characterization items                       | Instrument model                                                            | Manufacturer           |
|----------------------------------------------|-----------------------------------------------------------------------------|------------------------|
| Absorption spectra                           | Lambda-365 spectrophotometer                                                | Perkin Elmer, USA      |
| Fluorescence spectra                         | FluoroMax-4P spectrofluorometer                                             | Horiba Scientific, USA |
| Fluorescence/<br>Phosphorescence<br>lifetime | Fluolog-3<br>Ex: SpectraLED (355 nm, S-355),<br>DeltaDiode (320 nm, DD-320) | Horiba Jobin Yvon, USA |
| EPR                                          | EMXplus-10/12                                                               | Bruker, Switzerland    |
| TEM                                          | Tecnai G2 F20 S-TWIN<br>Acceleration voltage: 200 kV                        | FEI, USA               |
| XPS                                          | AXIS Ultra DLD<br>Excitation: Al-K $\alpha$ X-ray                           | Kratos, Japan          |
| Zeta potential                               | Zetasizer Nano ZS                                                           | Malvern, England       |
| Pt contents                                  | 5100 SVDV ICP-OES                                                           | Agilent, USA           |

## 1.3 Synthesis of Pt@CNNS

CNNS was obtained from XFNANO, Nanjing, China. Specifically, g-C<sub>3</sub>N<sub>4</sub> was produced by thermal polymerization of dicyandiamide at 550 °C (ramp rate of ~5 °C/min) for 4 h under nitrogen atmosphere. After cooling down, the yellowish product was collected and washed with distilled water to remove the residual ammonium. CNNS was obtained through exfoliating of g-C<sub>3</sub>N<sub>4</sub> in ethanol.

Pt@CNNS was prepared via a simple post-synthetic strategy. Briefly, 5 mL carbon nitride ethanol-water dispersion was washed by water, then re-dissolved in water. After ultra-sonication for 30 minutes, mixing 2.5 mL H<sub>2</sub>PtCl<sub>6</sub> (10 mM) in carbon nitride water solution. Then, the mixture was heated at 60 °C for 6 hours. Finally, the resulting orange-yellow dispersion was washed with ethanol and water for six times each. For

Au@CNNS and Pd@CNNS, the synthesis routes were similar to that of Pt@CNNS, except H<sub>2</sub>AuCl<sub>4</sub> and K<sub>2</sub>PdCl<sub>6</sub> was explored.

#### **1.4 Photozymatic activity and steady-state kinetic analysis of CNNS and Pt@CNNS**

The photozymatic activity of CNNS and Pt@CNNS were evaluated according to the previous work.<sup>1</sup> The experiments were conducted in sodium acetate buffer (20 mM, pH 4.0 or pH 7.0) containing Pt@CNNS (0.05 mg mL<sup>-1</sup>) and TMB (0.8 mM, DMSO). Then the mixture was irradiated by LED (3V, 3W) for 100 s. The absorption spectra of the reaction solution were measured after centrifugation at 12000 rpm for 5 minutes. The experimental procedures under alkaline conditions were the same as the above, except that the medium was sodium acetate containing sodium hydroxide (100 mM).

The steady-state kinetic analysis was carried out. In a typical procedure, TMB was added in sodium acetate buffer (20 mM, pH 4.0 or pH 7.0) containing Pt@CNNS (0.05 mg mL<sup>-1</sup>) by changing the concentration of TMB (0.1-1.0 M), then the absorbance at 652 nm was measured using UV-vis spectrophotometer after 3 s of each irradiation. Additionally, the kinetic parameters were calculated according to the Michaelis-Menten equation as follows:

$$\frac{1}{V} = \left( \frac{K_m}{V_{max}} \right) * \left( \frac{1}{[S]} \right) + \frac{1}{V_{max}}$$

Where  $K_m$  is the Michaelis constant,  $V_{max}$  is the maximum reaction velocity, and  $[S]$  is the TMB concentration.

## 1.5 Absorption of Pt@CNNS and CNNS with TMB

For the typical absorption process, sodium acetate buffer (20 mM, pH = 7.0) containing Pt@CNNS or CNNS (0.05 mg mL<sup>-1</sup>) and TMB (0.8 mM, DMSO) were mixed to 2-mL centrifugation tube and then diluted to 1 mL by water. After incubated 1min, centrifugation at 12000 rpm for 30 minutes. At last, the absorbance of supernatants was detected. As for control, TMB without photozyme was the blank group.

## 1.6 ROS characterization

For ROS scavenging, the corresponding ROS-specific scavengers, namely superoxide dismutase (SOD) for  $\cdot\text{O}_2^-$ , D-tryptophan for  $^1\text{O}_2$ , catalase for  $\text{H}_2\text{O}_2$ , and mannite for  $\cdot\text{OH}$ , were used.<sup>2</sup> The concentrations for the above scavengers were: SOD, 800 U; D-tryptophan, 4.9 mM; catalase, 150 U; mannite, 10.0 mM. The experimental procedures were the same as the above (photozymatic activity), except that the absorbance was measured in the presence of the scavengers.

For EPR measurements, TEMP and DMPO (100 mM) were employed as the spin traps for  $^1\text{O}_2$  and  $\cdot\text{O}_2^-$ , respectively. After irradiation for 10 min, the EPR spectra were recorded.

For  $\cdot\text{OH}$  measurement, terephthalate (6 mM) incubated with Pt@CNNS under blue LED irradiation for 30 minutes.

## 1.7 Assessing the antioxidants in alleviating photozymatic activity

The colorimetric system responded to the main antioxidants in tea leaves at both neutral and acidic pH levels. For the eight typical antioxidants in tea, including (-)-Epigallocatechin gallate (EGCG), (±)-Catechin hydrate (CT), Gallic acid (GA), Ascorbic acid (AA), Chlorogenic acid (CHA), Caffeic acid (CA), Quercetin (QR), Rutin, were explored. In a typical procedure, 20  $\mu$ M GA was added in sodium acetate buffer (20 mM, pH 4.0 or pH 7.0) containing Pt@CNNS (0.05 mg/mL) and TMB (0.8 mM, DMSO). After irradiation for 100 s, the absorbance at 65 nm was recorded.

## 1.8 Evaluation antioxidants capacities in tea samples at neutral pH

Tea was bought from the local market. Firstly, dry leaves (0.05 g) of each tea were suspended in 25 ml water at different temperature. Then the tea was kept for 15 min (at different temperature 20 °C -100 °C) or 1 min (at 100 °C). Finally, the tea extracts were filtered with 0.22  $\mu$ m membrane. The resultant samples were stored at 4 °C refrigerator.

The antioxidant capacity was evaluated by using the standard curve method. The 100-fold diluted tea samples were added into sodium acetate buffer (20 mM, pH 7.0) containing TMB (0.8 mM, DMSO), Pt@CNNS (0.05 mg mL<sup>-1</sup>) and the absorbance at 652 nm measured. As for control experiments, classical spectroscopic Folin-Ciocalteu method was also introduced to evaluate total antioxidants in tea. Briefly to the volume of 1 mL GA solution or practical sample solution, 5 mL of F-C reagent (10%, v/v) was added. Then, after 5 minutes, 4 mL of Na<sub>2</sub>CO<sub>3</sub> (7.5%, v/v) was mixed with the above solution and the mixture was incubated at 25 °C for 1 hour. The reacted system was detected by a UV-vis spectrophotometer and the absorbance was recorded at 765 nm.

## Section 2. Materials characterizations

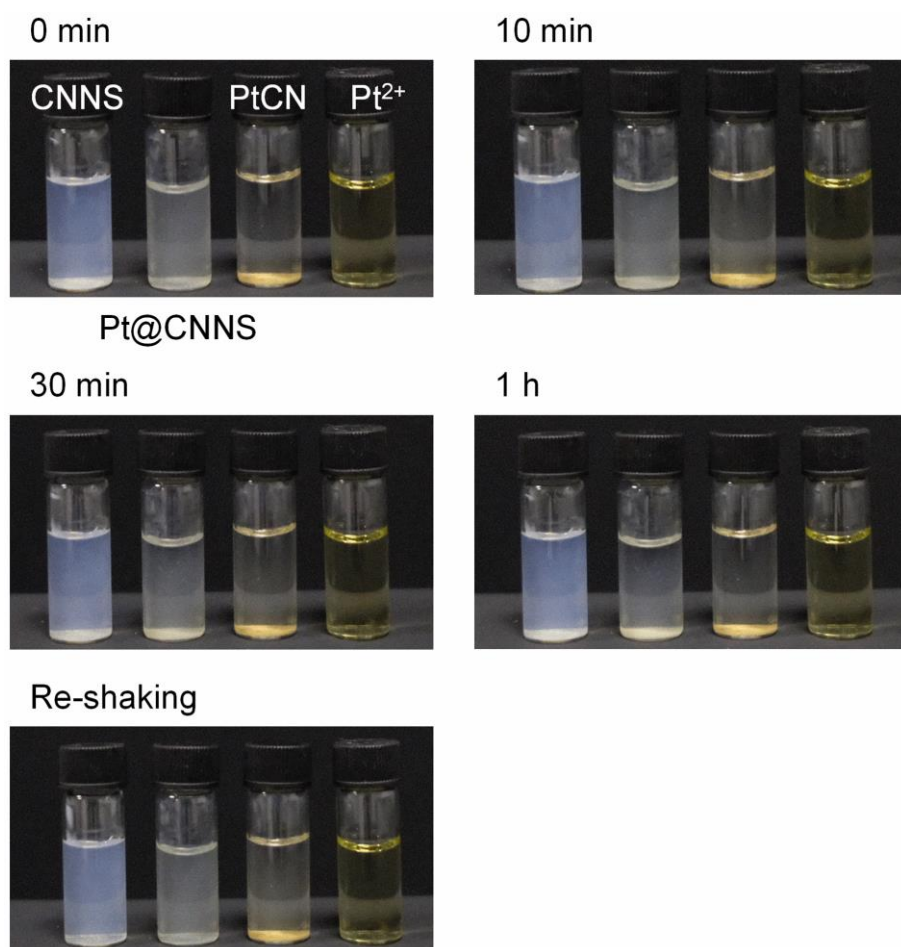

**Figure S1** Comparison of the dispersion of materials synthesized by pre-doping (PtCN) and post-doping (Pt@CNNS).

**Notes:** The pre-doped PtCN could not be homogeneously dispersed, while the post-doped Pt@CNNS started to show a small amount of precipitation after one hour and was homogeneously redispersed after shaking.



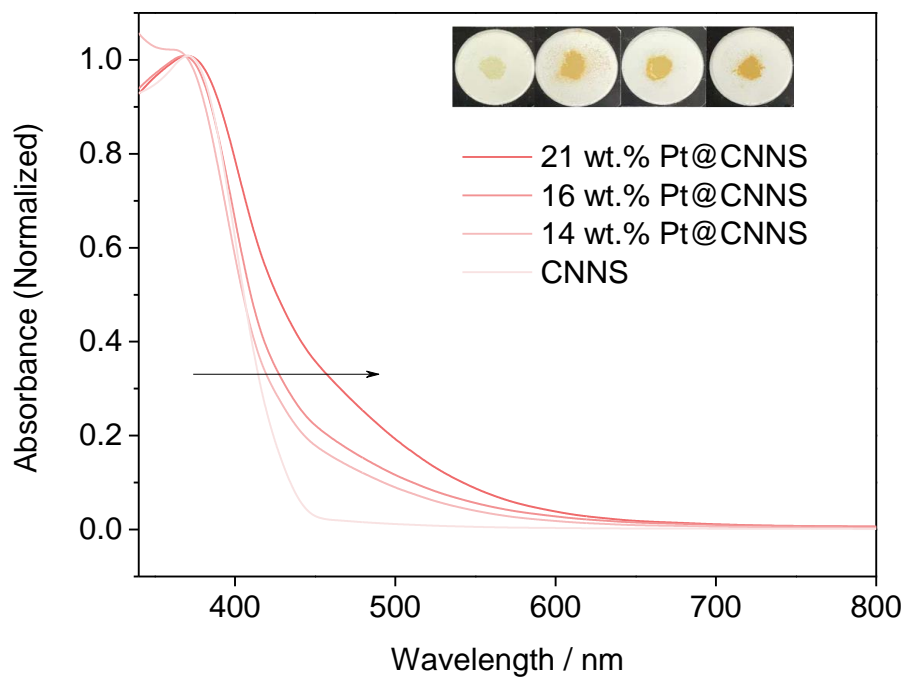

**Figure S2.** The UV-vis diffused reflectance spectra of CNNS and Pt@CNNS.

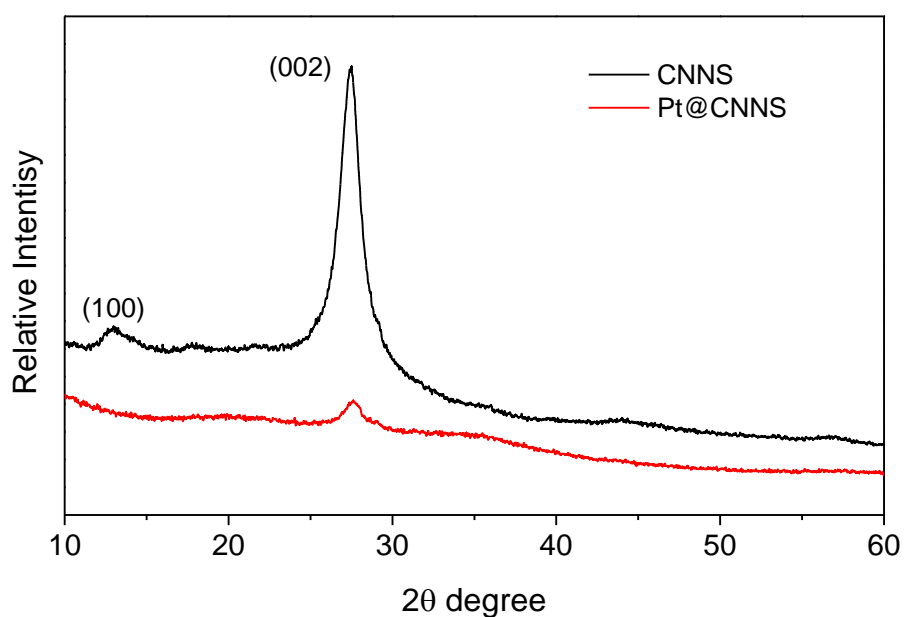

**Figure S3.** The XRD patterns of CNNS and Pt@CNNS.

**Notes:** Compared with CNNS, the peak shape was broadened, accompanied with sharply decreased peak intensity, clearly demonstrating that the layered structure of CNNS was perturbed upon Pt incorporation.

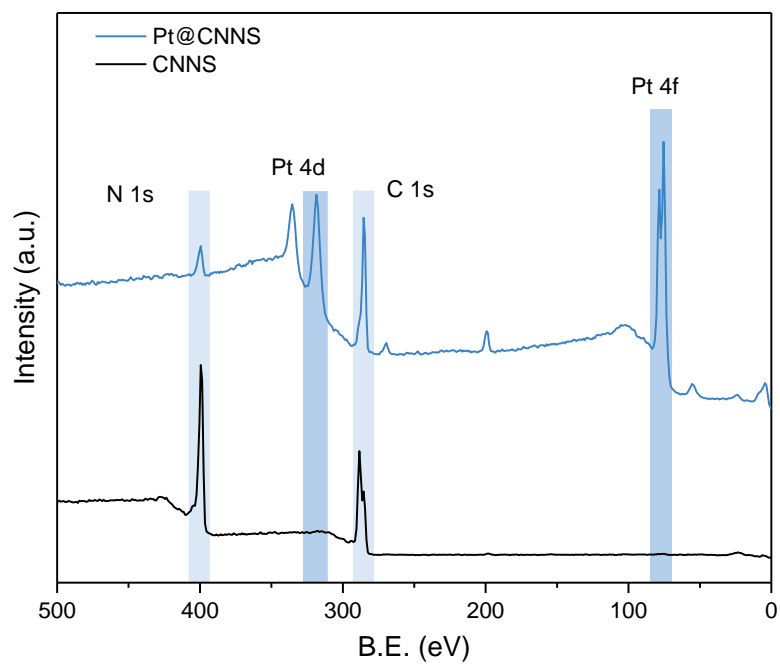

**Figure S4.** Full spectra XPS of CNNS and Pt@CNNS.

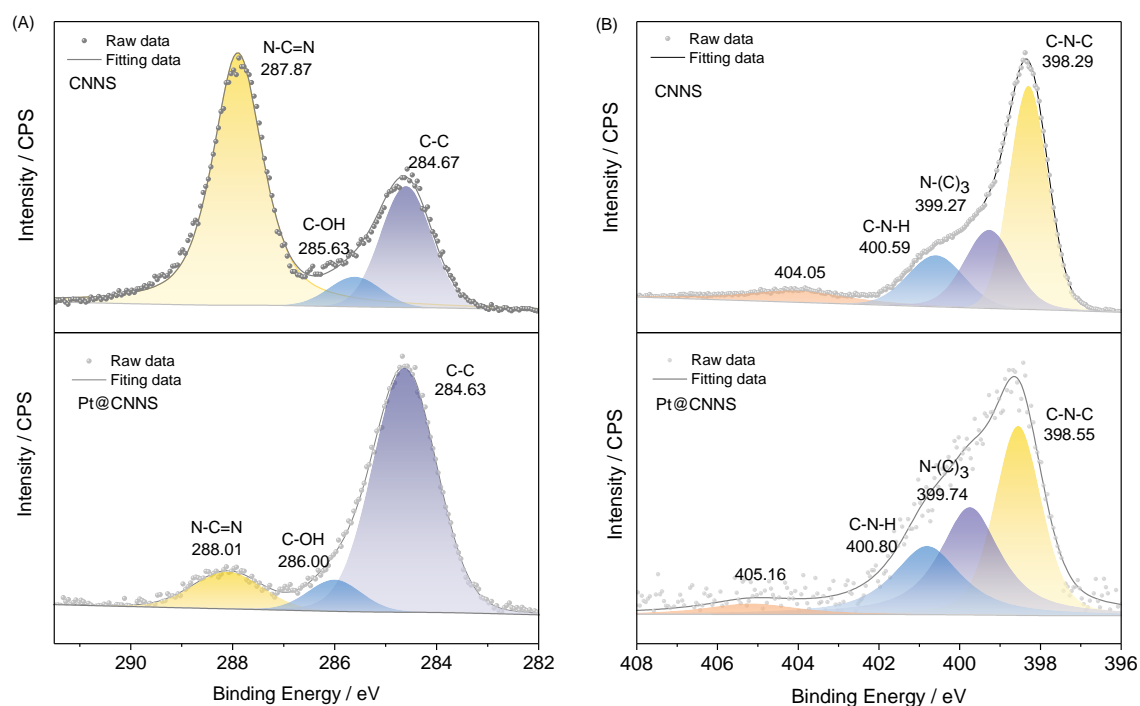

**Figure S5.** The high resolution XPS profiles of (A) C 1s and (B) N 1s.

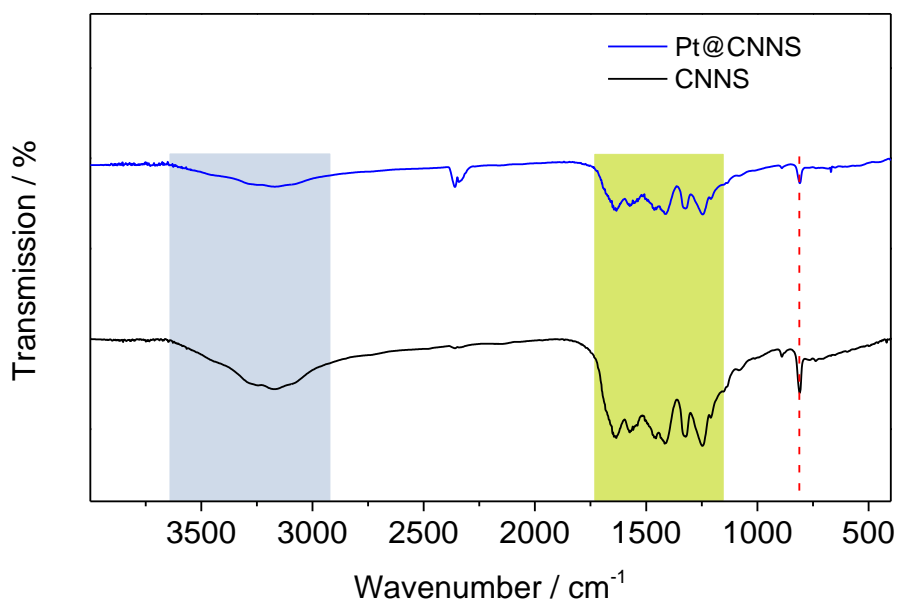

**Figure S6.** The FTIR spectra of CNNS and Pt@CNNS.

**Notes:** The bonding of carbon and nitrogen in the CNNS and Pt@CNNS was analyzed through FTIR spectra. They exhibited several major bands centered at about 3180  $\text{cm}^{-1}$ , 1160-1730  $\text{cm}^{-1}$  and 806  $\text{cm}^{-1}$ . The broad 3180  $\text{cm}^{-1}$  band can be attributed to the stretching vibration of N–H groups and the stretching modes in the 1200-1700  $\text{cm}^{-1}$  range were typical for aromatic C–N heterocycles. In addition, the characteristic breathing mode of the triazine unit is observed at 806  $\text{cm}^{-1}$ .<sup>3</sup> The intensity of these peaks decreases with Pt doping, suggesting that CNNS contains numerous triazine rings that comprise  $\text{sp}^2$  C–N bonds such as N=C–N and C–N=C.<sup>4</sup>

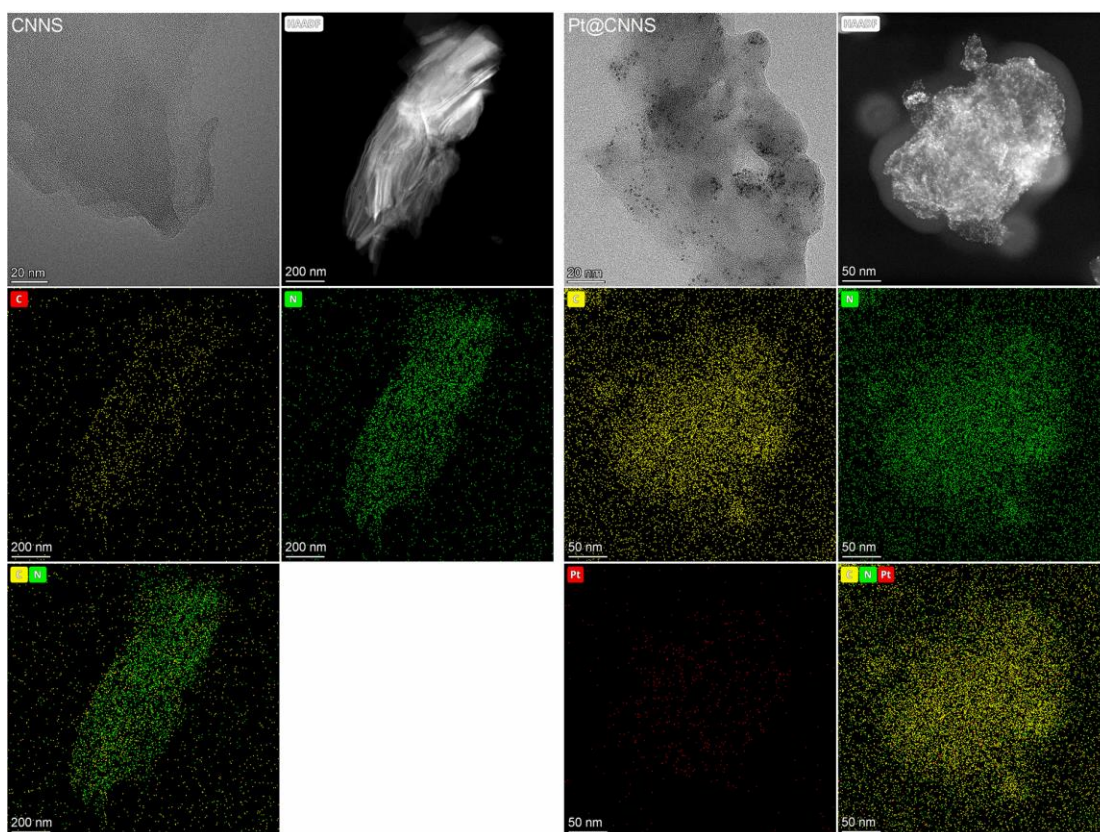

**Figure S7.** TEM images of CNNS and Pt@CNNS and the corresponding elemental mapping of C, N, and Pt.

**Notes:** From the above TEM images, some nanoparticles (PtOx) could be identified for Pt@CNNS. Such observation is reasonable, since our synthetic route (CNNS + H<sub>2</sub>PtCl<sub>6</sub>, 60 °C, 6 h) was similar to Nichols et al. (CNNS + PtCl<sub>2</sub>/ H<sub>2</sub>PtCl<sub>6</sub>, 90 °C, 48 h).<sup>5</sup> However, upon comparison between the TEM image and the elemental map of Pt, it is clear that besides the nanoparticles, additional Pt (probably ionic Pt) could also be identified. We think that the ionic Pt was responsible for the enhanced photozymatic activity of CNNS at neutral pH, based on the following considerations:

1. Broadened absorption of Pt@CNNS versus CNNS is typical attributed to MLCT from Pt<sup>2+</sup> to CNNS;
2. It is possible that the PtOx nanoparticles may also contributed to TMB oxidation, but distinct responses were obtained for Pt@CNNS in the absence and presence of light irradiation (either pH 4 or pH 7).

### Section 3. Photozymatic activity of Pt@CNNS

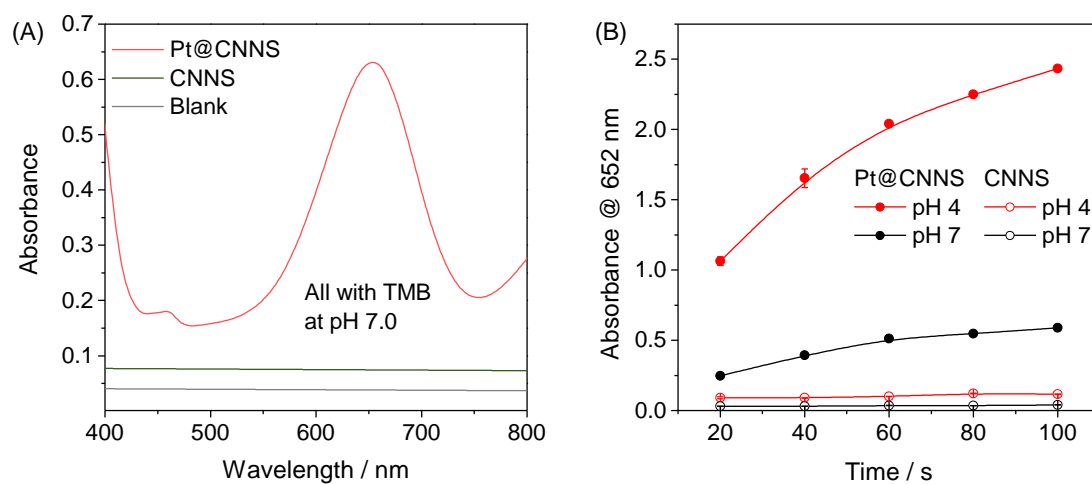

**Figure S8.** (A) Absorption profiles of TMB after photo-oxidation with CNNS and Pt@CNNS at pH = 7; and (B) time-dependent TMB oxidation with Pt@CNNS and CNNS at pH = 4 and 7.

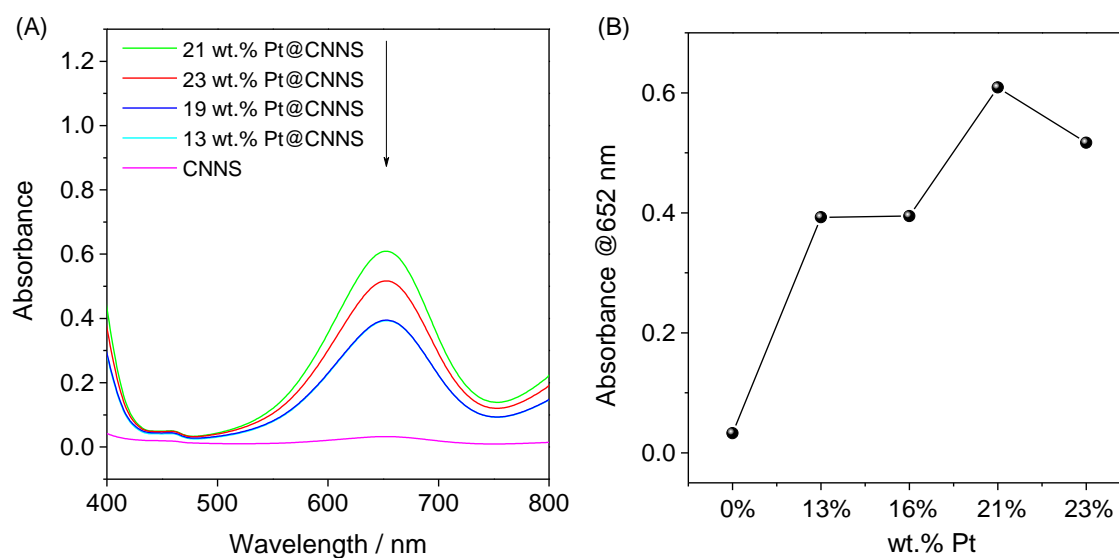

**Figure S9.** Pt@CNNS oxidized TMB with different Pt doping contents. Experimental conditions: Photozyme: 0.05 mg mL<sup>-1</sup>; buffer: 20 mM sodium acetate buffer pH 4.0; TMB: 0.8 mM. The final contents of Pt were 2.47% (13%), 2.55% (19%), 3.19% (21%), and 1.05% (23%), respectively.

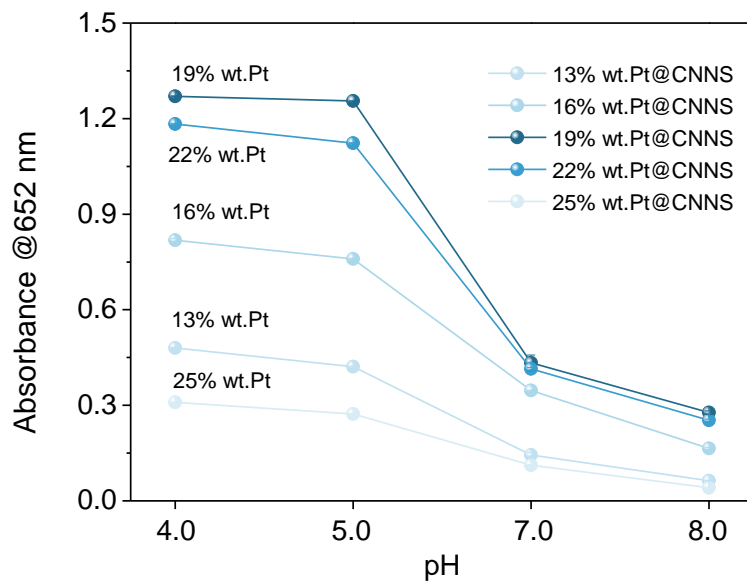

**Figure S10.** pH-dependent activity of Pt@CNNS (varied Pt contents).

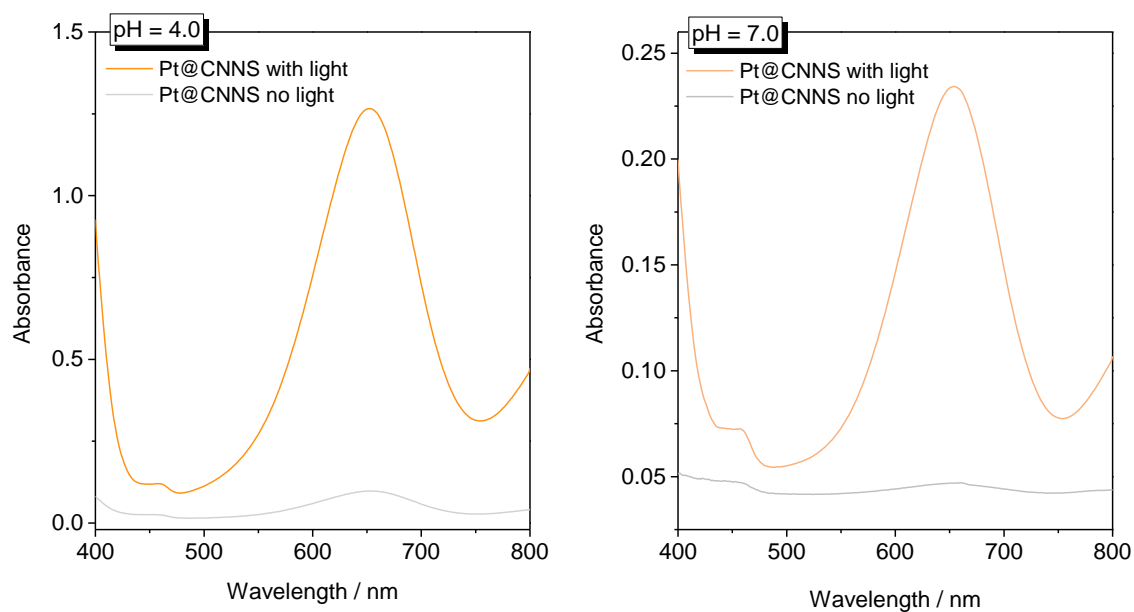

**Figure S11.** TMB oxidation at pH 4 and 7 in the absence and presence of light.

**Notes:** As can be evidenced from the TEM images in Figure S7, there are PtOx nanoparticles formed on CNNS. It is possible that the PtOx nanoparticles may also contributed to TMB oxidation, but distinct responses were obtained for Pt@CNNS in the absence and presence of light irradiation (either pH 4 or pH 7). Besides, Broadened absorption of Pt@CNNS versus CNNS is typical attributed to MLCT from Pt<sup>2+</sup> to CNNS.

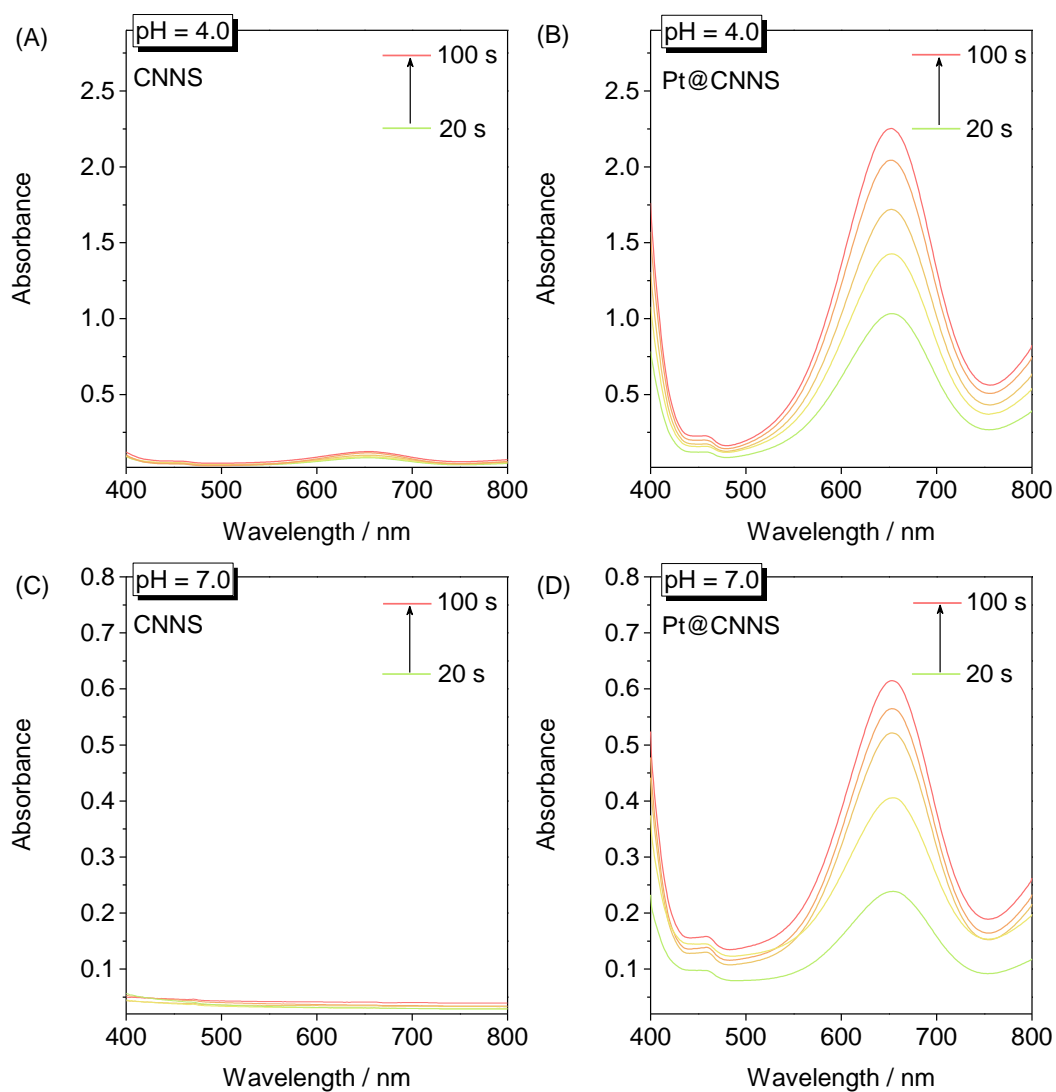

**Figure S12.** Time-dependent TMB oxidation with CNNS (A and C) and Pt@CNNS (B and D). Experimental conditions: Photozyme: 0.05 mg/mL; buffer: 20 mM sodium acetate buffer pH 4.0; TMB: 0.8 mM.

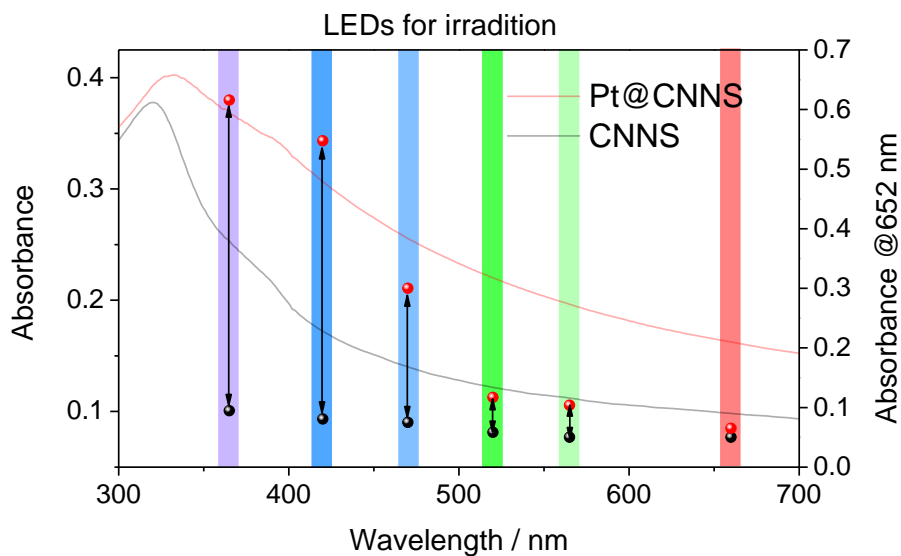

**Figure S13.** Wavelength-dependent TMB oxidation of Pt@CNNS at neutral pH (pH = 7.0) and CNNS at acidic pH (pH= 4.0). Experimental conditions: Photozyme: 0.05 mg mL<sup>-1</sup>; buffer: 20 mM sodium acetate buffer pH 7.0 or 4.0; TMB: 0.8 mM.

**Notes:** The photozymatic performance of the photozyme depends on the wavelength of light absorption (Fig. 1A), so the photo-induced oxidation of TMB by Pt@CNNS and CNNS in the presence of different LEDs (3V, 3W) were compared. As shown in Fig. S13, the oxidation performance results agreed well with the absorbance wavelength.



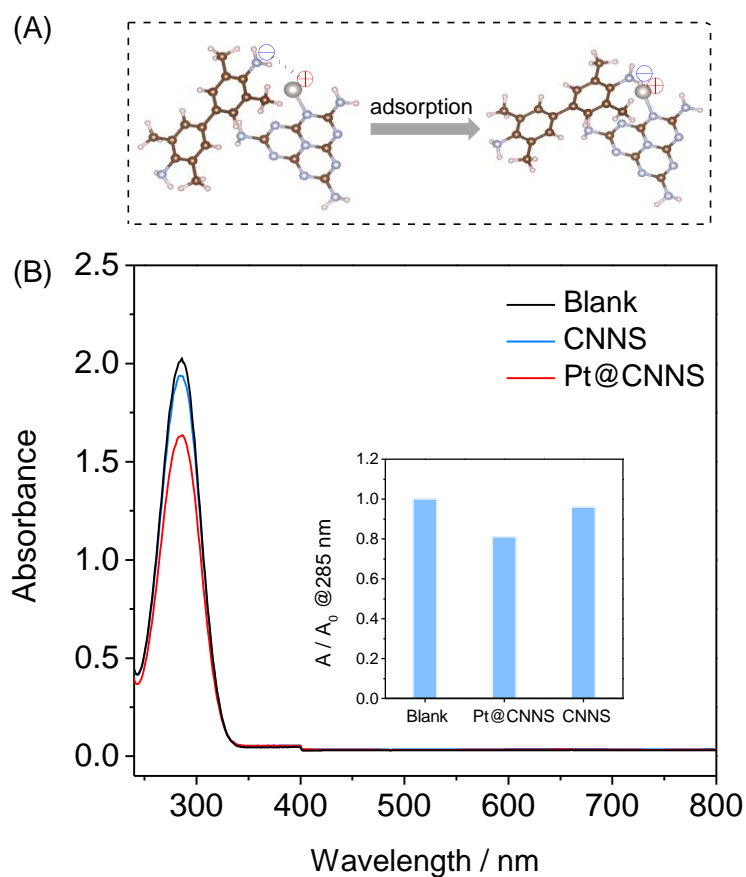

**Figure S14.** (A) The Schematic of adsorption mechanism; (B) the UV-vis absorbance spectra of Pt@CNNS and CNNS with TMB. The inset in figure was the relative intensity of the absorbance.

**Notes:** For the apparent change of  $K_m$ , potential adsorption of Pt@CNNS or CNNS were proposed. In the adsorption process, the electron-rich N- of TMB was attracted to the Pt of Pt@CNNS. As shown in Fig. S14, the TMB absorbance at 288 nm markedly decreased as the nanozyme added, but the absorbance at 652 nm did not appear, suggesting that the decrease at 288 nm was not oxidation-induced.

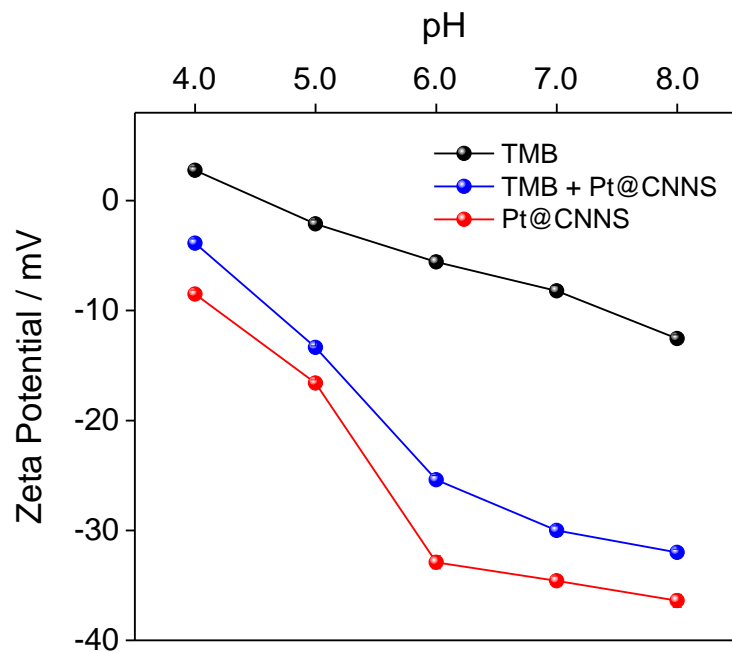

Revised Figure R10

**Figure S15.** Zeta potentials of TMB, Pt@CNNS, and “TMB + Pt@CNNS” at different pH.

## Section 4. Enzymatic kinetics of Pt@CNNS

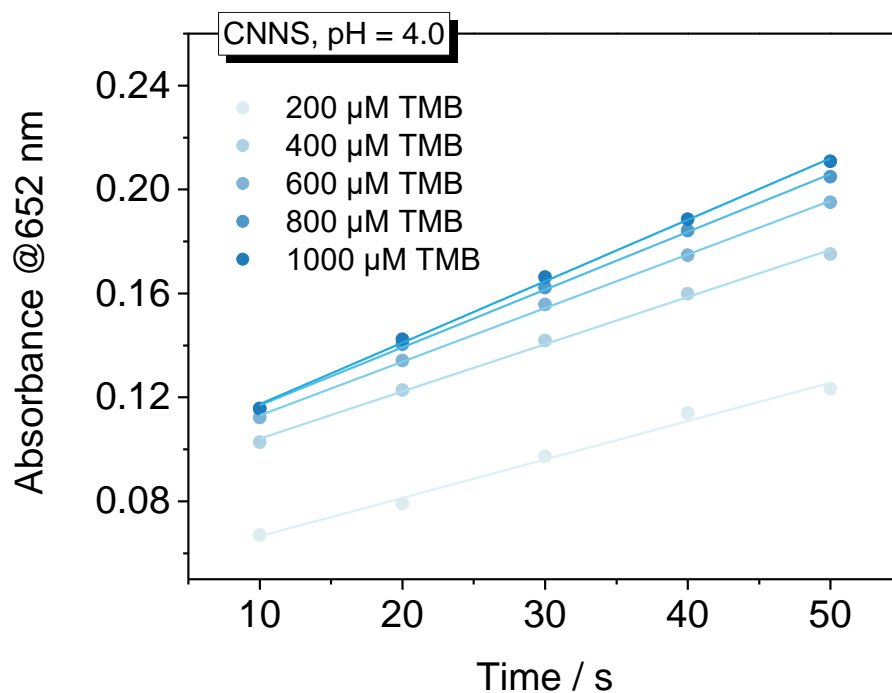

**Figure S16.** The enzyme-like activity of CNNS at pH 4.

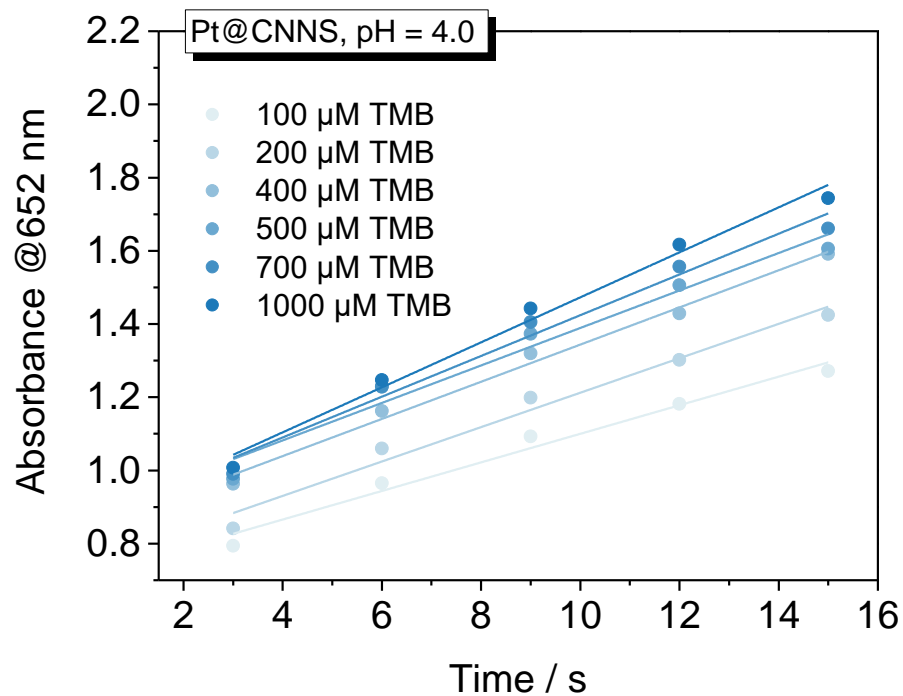

**Figure S17.** The enzyme-like activity of Pt@CNNS at pH 4.

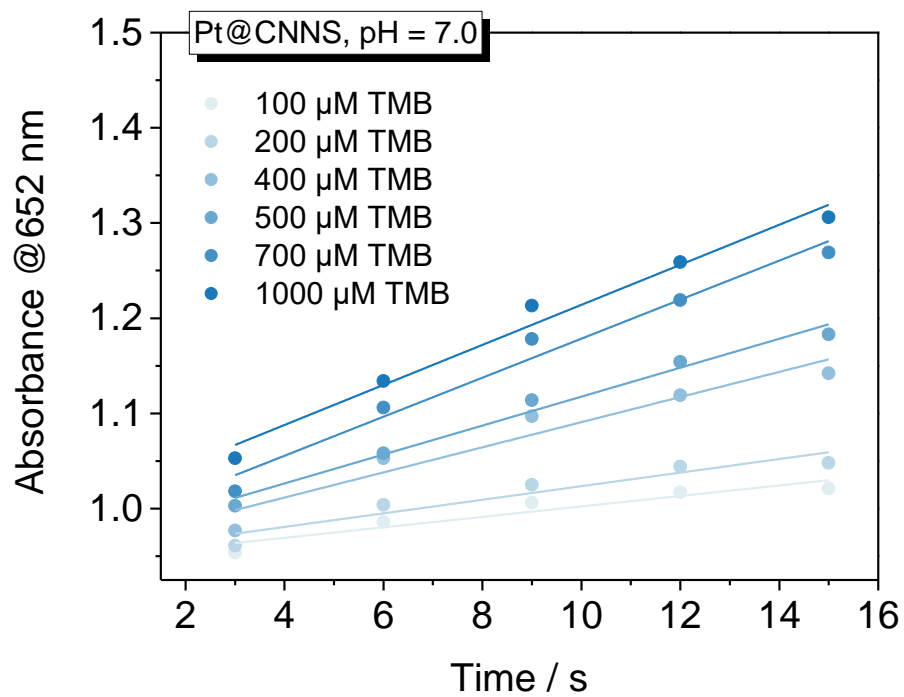

**Figure S18.** The enzyme-like activity of Pt@CNNS at pH 7.

## Section 5. ROS generation from Pt@CNNS

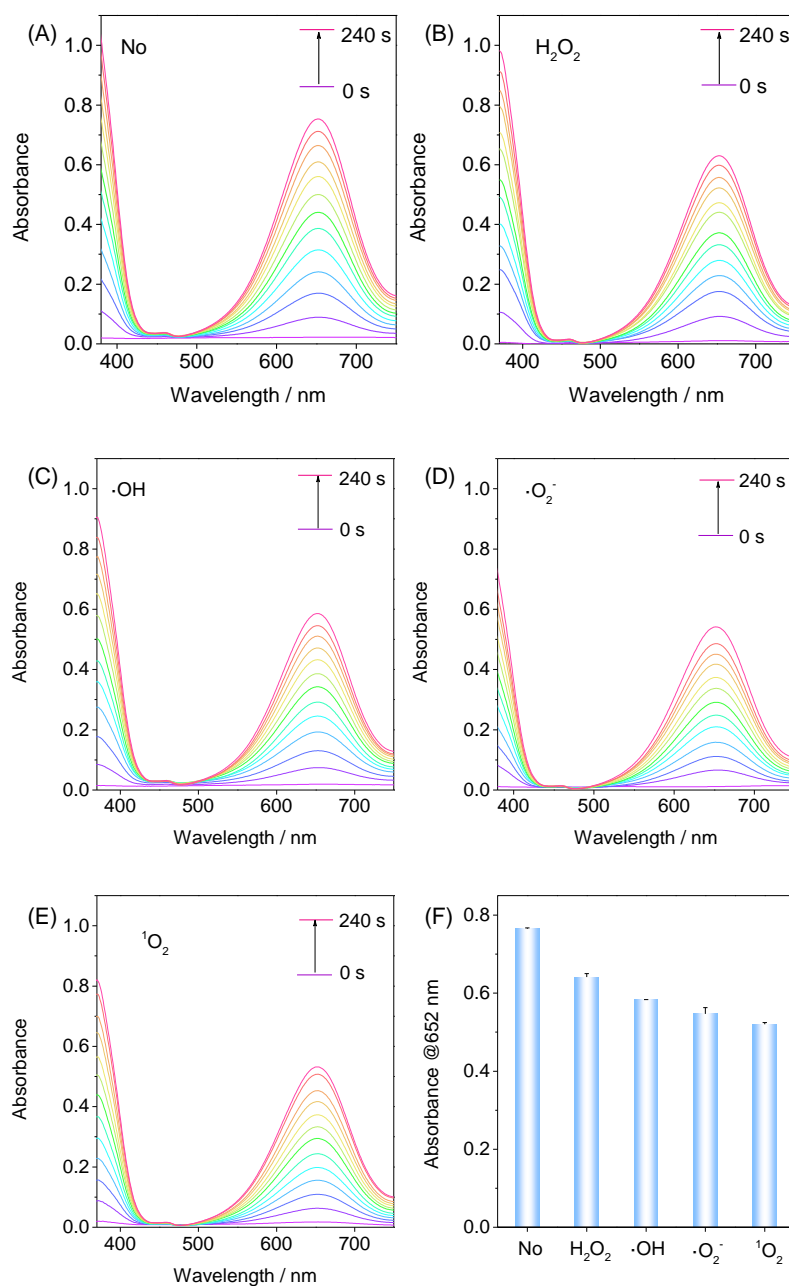

**Figure S19.** The absorbance of TMB oxidation with Pt@CNNS at pH 4 in the presence of ROS scavengers: (A) No scavengers; (B) catalase; (C) mannite; (D) superoxide dismutase; (E) D-tryptophan. (F) Comparison of the main ROS in the process of TMB oxidation. Experimental conditions: Photozyme: 0.02 mg mL<sup>-1</sup>; buffer: 20 mM sodium acetate buffer pH 4.0; TMB: 0.8 mM; SOD: 800 U; D-tryptophan: 4.9 mM; catalase: 150 U; mannite: 10.0 mM.

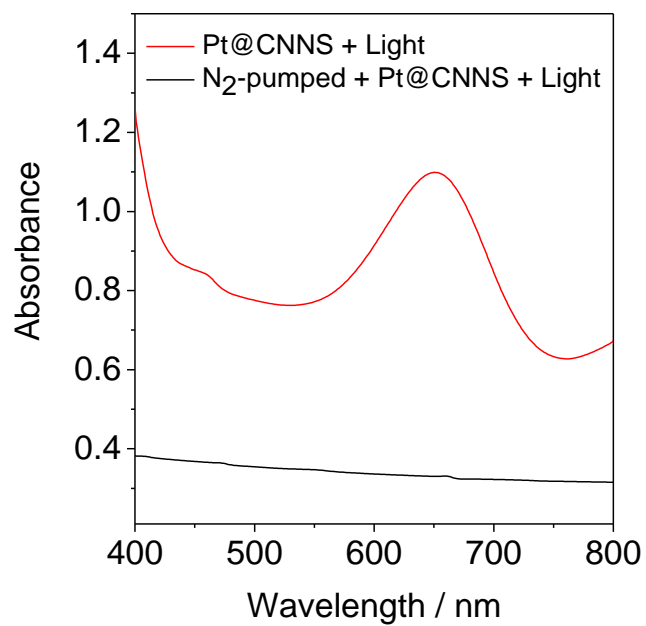

**Figure S20.** The absorbance spectra of Pt@CNNS with TMB under different conditions.

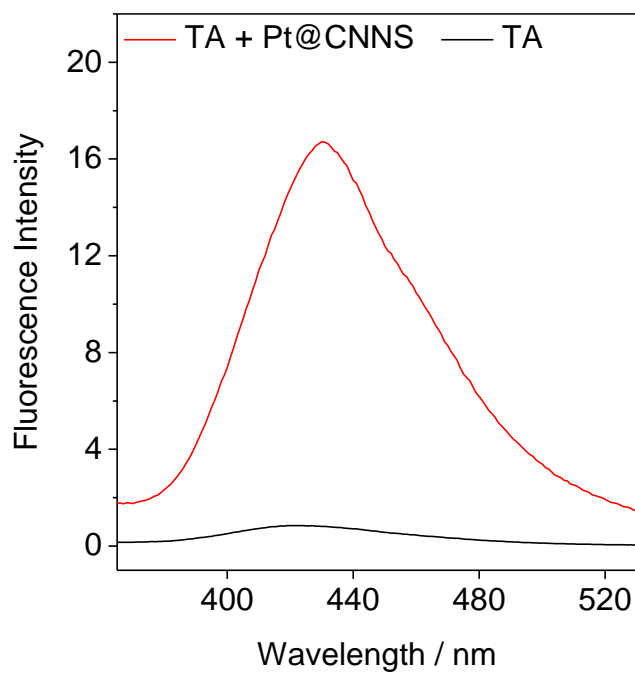

**Figure S21.** Fluorescence spectra of terephthalate incubated with Pt@CNNS under blue LED irradiation. Experimental conditions: terephthalate (6 mM); buffer: 100 mM sodium acetate buffer pH 7.0.

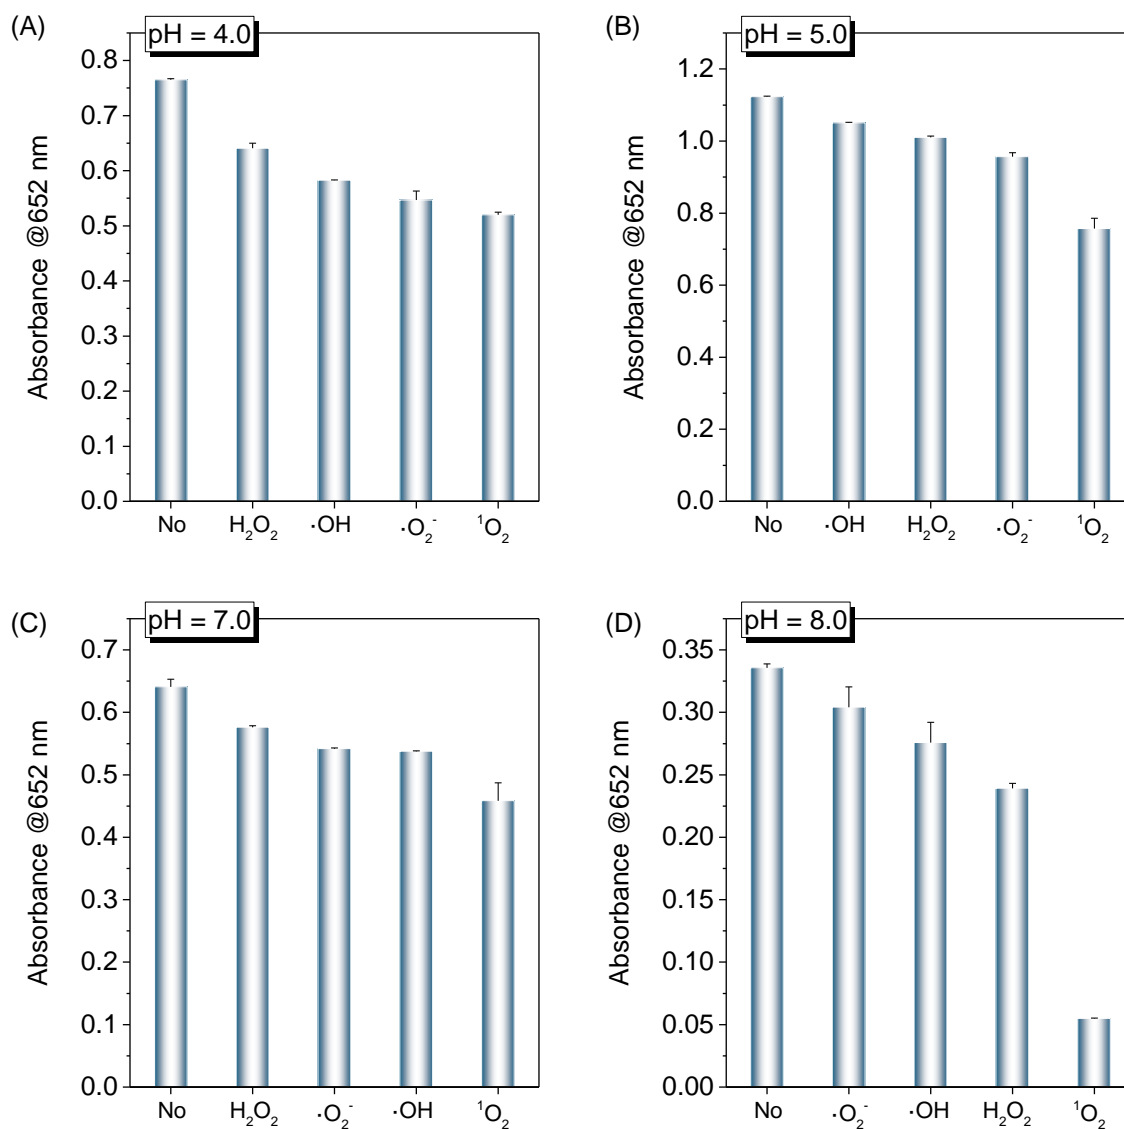

**Figure S22.** Identification of the specific ROS generated for TMB oxidation at pH 7 through scavenger studies. Experimental conditions: Photozyme: pH 4.0: 0.02 mg mL<sup>-1</sup>; pH 5.0: 0.03 mg mL<sup>-1</sup>; pH 7.0-8.0: 0.05 mg mL<sup>-1</sup>; buffer: 20 mM sodium acetate buffer pH 7.0; TMB: 0.8 mM; SOD: 800 U; D-tryptophan: 4.9 mM; catalase: 150 U; mannite: 10.0 mM.

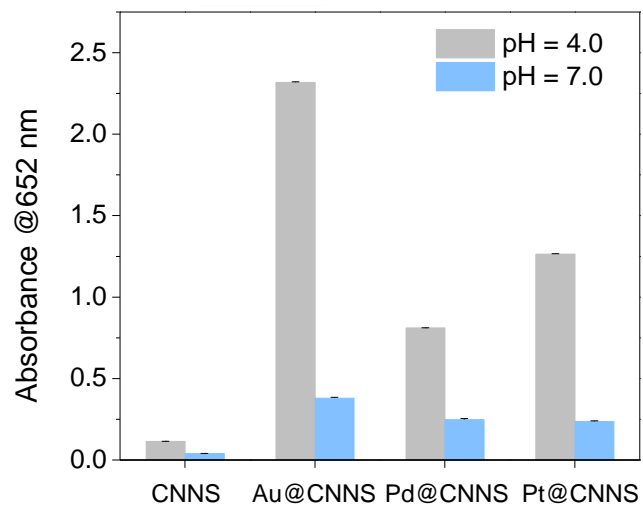

**Figure S23.** Comparison of the photozymatic activity of CNNS, Pt@CNNS, Au@CNNS, and Pd@CNNS.



## Section 6. Colorimetric Determination of Antioxidants

**Table S3.** Structures of the antioxidants investigated in this work.

|                                     |                           |                  |                    |
|-------------------------------------|---------------------------|------------------|--------------------|
| (-)-Epigallocatechin gallate (EGCG) | (±)-Catechin hydrate (CT) | Gallic acid (GA) | Ascorbic acid (AA) |
|                                     |                           |                  |                    |
| Chlorogenic acid (CHA)              | Caffeic acid (CA)         | Quercetin (QR)   | Rutin              |
|                                     |                           |                  |                    |

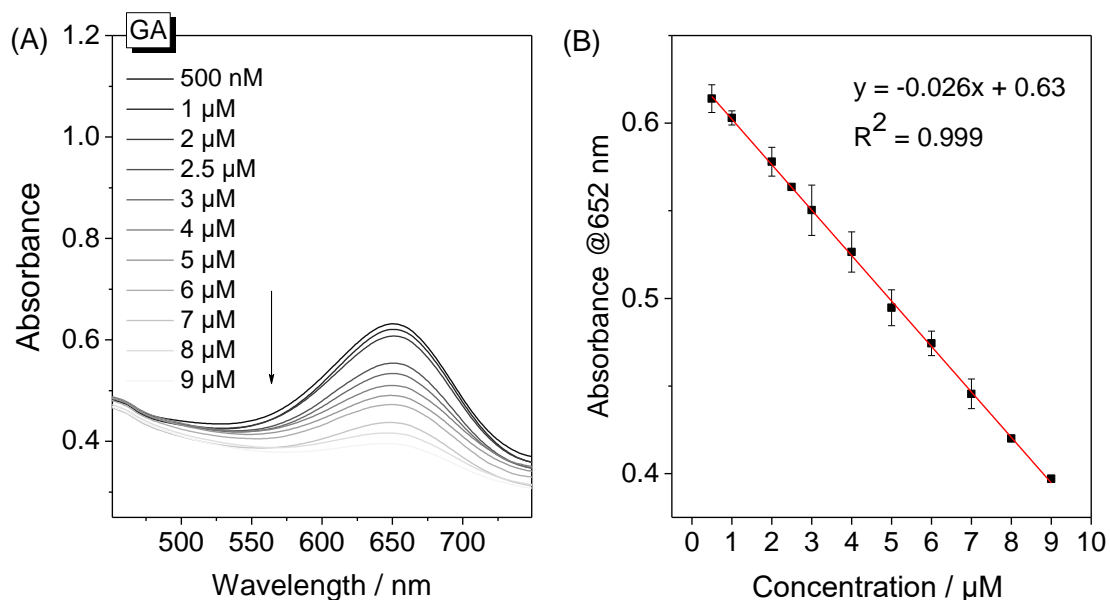

**Figure S24.** (A) The UV-vis absorbance spectra at different EGCG concentration and the (B) standard calibration curve in colorimetric analysis at pH 7.

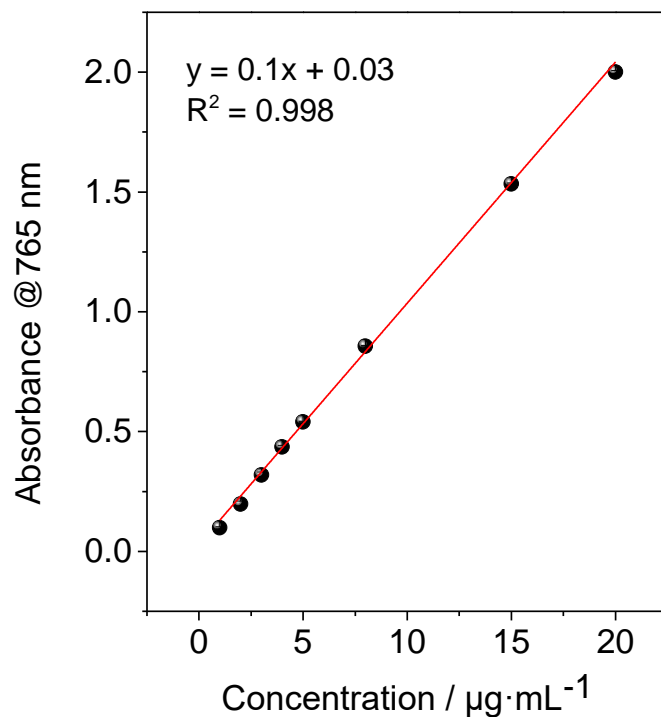

**Figure S25.** Standard calibration curve of classical Folin-Ciocalteu method.

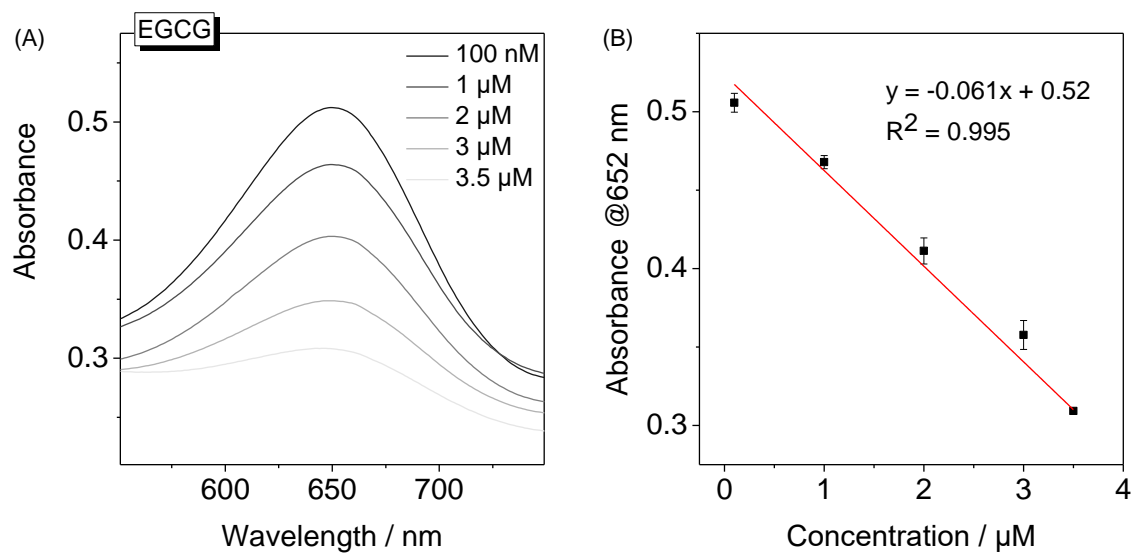

**Figure S26.** (A) The UV-vis absorbance spectra at different EGCG concentration and (B) the linear curve between absorbance and EGCG concentration.

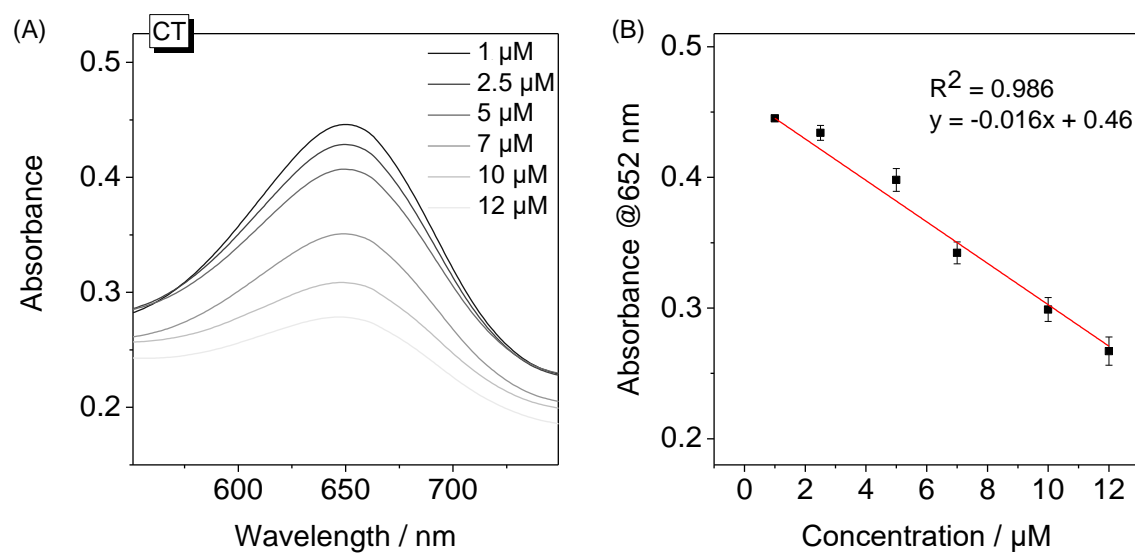

**Figure S27.** (A) The UV-vis absorbance spectra at different CT concentration and (B) the linear curve between absorbance and CT concentration.

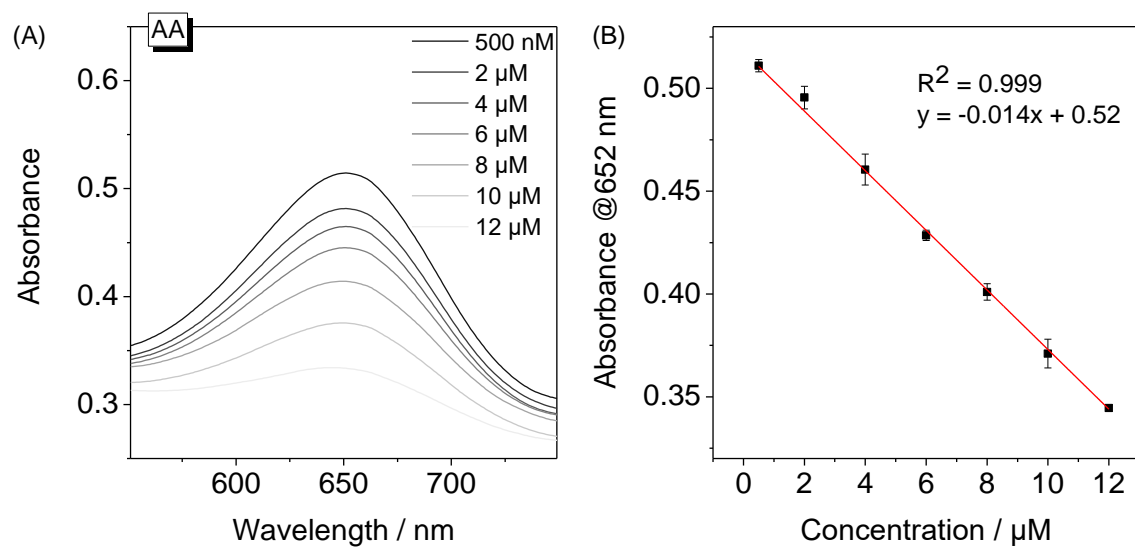

**Figure S28.** (A) The UV-vis absorbance spectra at different AA concentration and (B) the linear curve between absorbance and AA concentration.

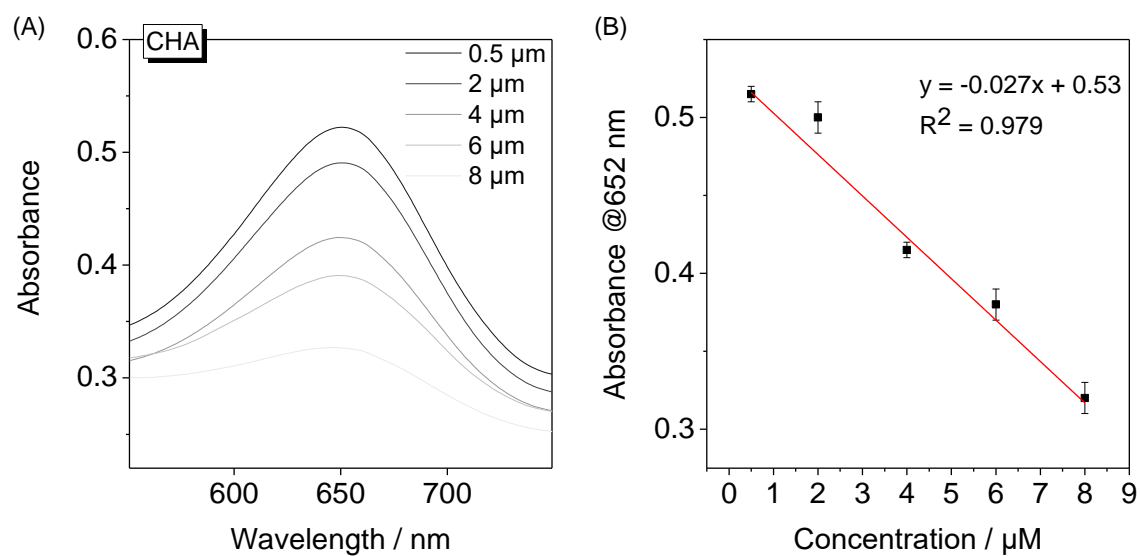

**Figure S29.** (A) The UV-vis absorbance spectra at different CHA concentration and (B) the linear curve between absorbance and CHA concentration.

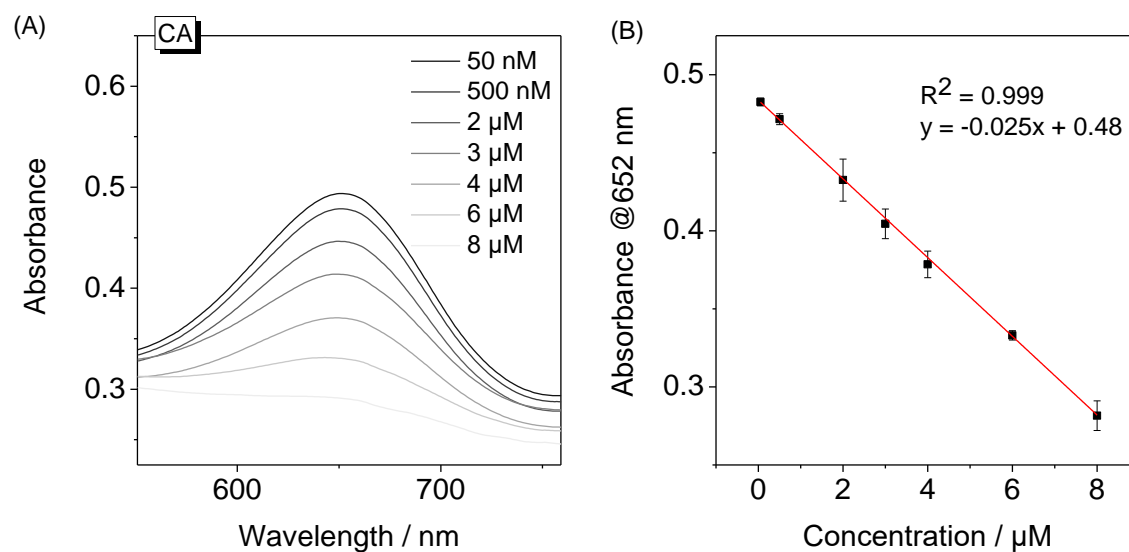

**Figure S30.** (A) The UV-vis absorbance spectra at different CA concentration and (B) the linear curve between absorbance and CA concentration.

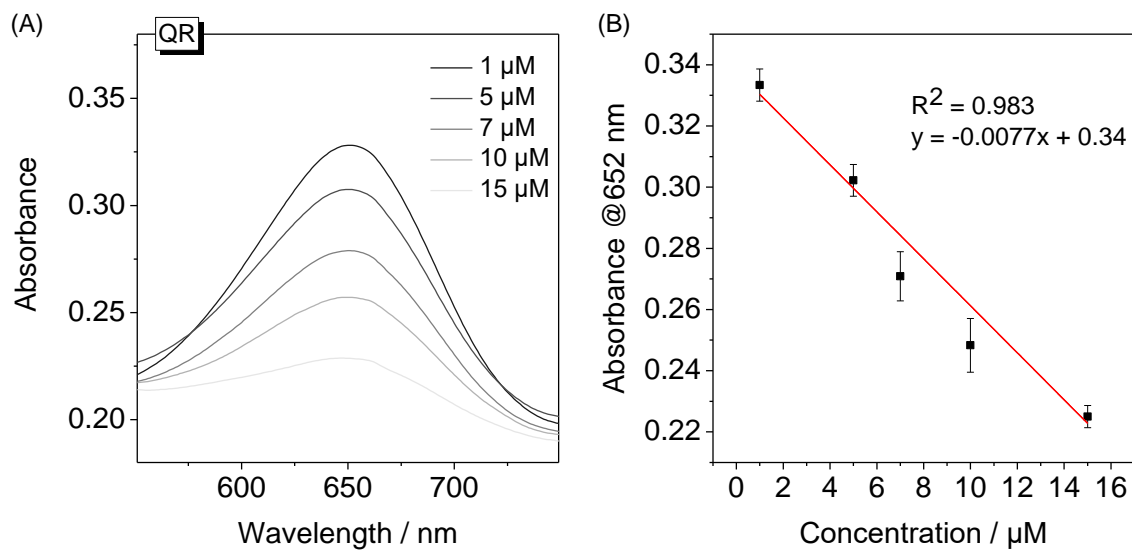

**Figure S31.** (A) The UV-vis absorbance spectra at different QR concentration and (B) the linear curve between absorbance and QR concentration.

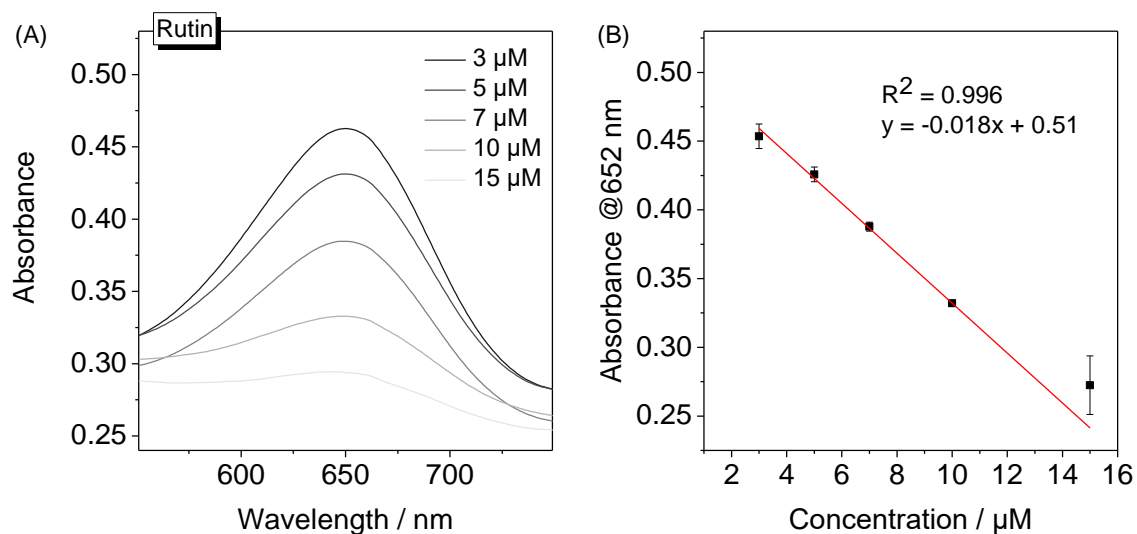

**Figure S32.** (A) The UV-vis absorbance spectra at different Rutin concentration and (B) the linear curve between absorbance and Rutin concentration.

**Table S4.** Linear Equations, Correlation Coefficients and Linear Ranges for Antioxidants.

| Antioxidants                 | Linear equation       | Linear range ( $\mu\text{mol}\cdot\text{L}^{-1}$ ) | R <sup>2</sup> |
|------------------------------|-----------------------|----------------------------------------------------|----------------|
| (-)-Epigallocatechin gallate | $y = -0.061x + 0.52$  | 0.10 ~ 3.5                                         | 0.995          |
| (±)-Catechin hydrate         | $y = -0.016x + 0.46$  | 1.0 ~ 12                                           | 0.986          |
| Gallic acid                  | $y = -0.026x + 0.63$  | 0.50 ~ 9.0                                         | 0.999          |
| Ascorbic acid                | $y = -0.014x + 0.52$  | 0.50 ~ 12                                          | 0.999          |
| Chlorogenic acid             | $y = -0.027x + 0.53$  | 0.50 ~ 8.0                                         | 0.979          |
| Caffeic acid                 | $y = -0.025x + 0.48$  | 0.050 ~ 8.0                                        | 0.999          |
| Quercetin                    | $y = -0.0077x + 0.34$ | 1.0 ~ 15                                           | 0.983          |
| Rutin                        | $y = -0.018x + 0.51$  | 3.0 ~ 15                                           | 0.996          |

## Section 7. Evaluation of Antioxidants in Tea samples

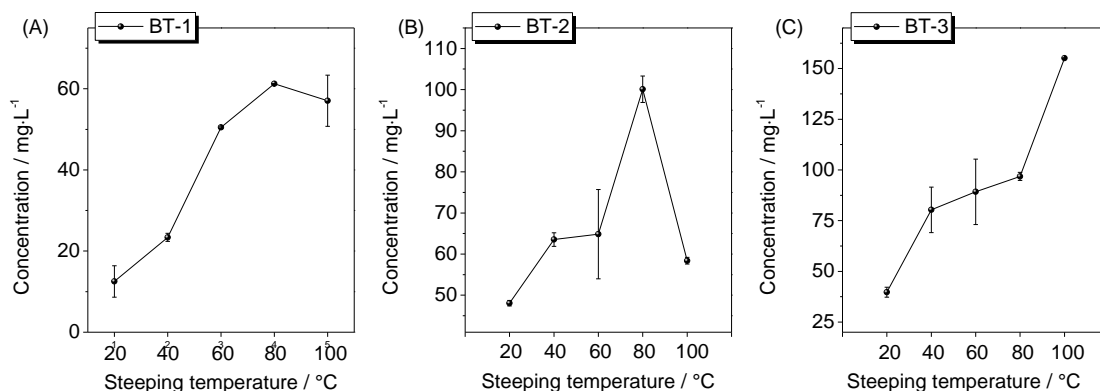

**Figure S33.** Effect of steeping temperature on antioxidants capacities of each of the three Black Teas (BT).

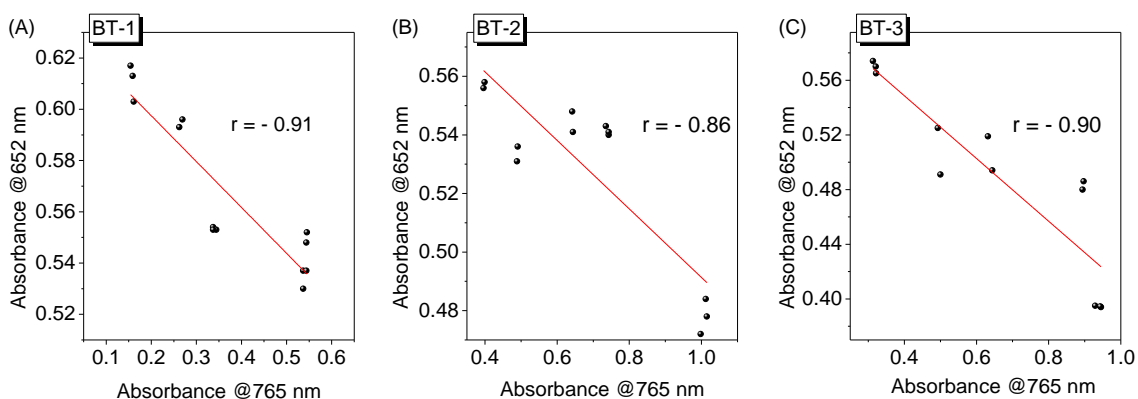

**Figure S34.** The results of this method and the Folin-Ciocalteu method for the analysis of the effect of steeping temperature on the antioxidant capacities of BT with Bland-Altman analysis.

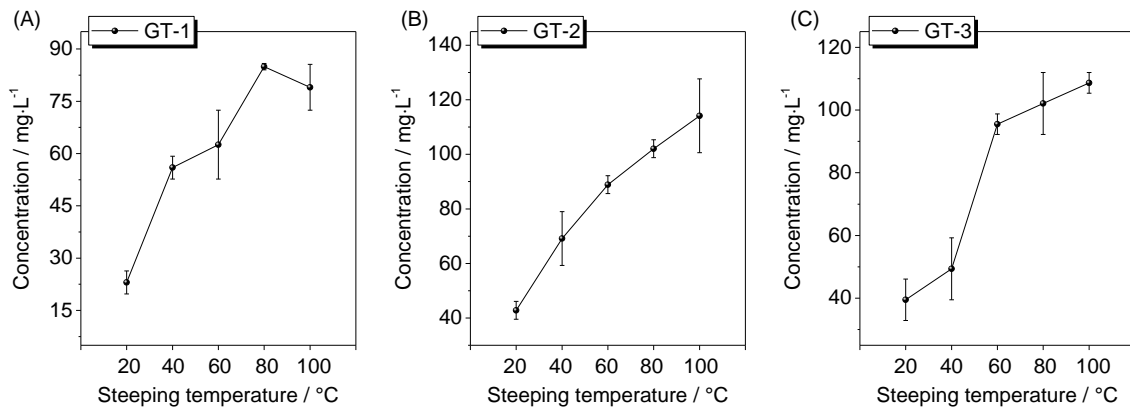

**Figure S35.** Effect of steeping temperature on antioxidants capacities of each of the three Green Teas (GT).

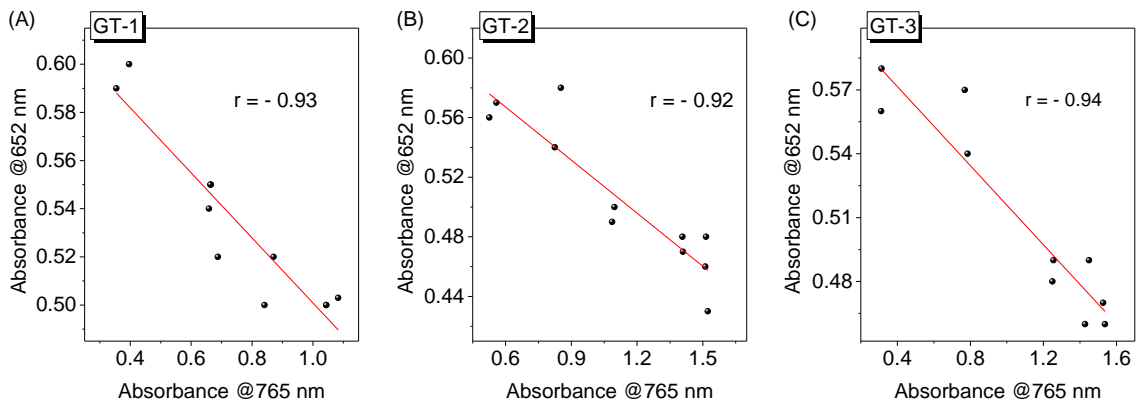

**Figure S36.** The results of this method and the Folin-Ciocalteu method for the analysis of the effect of steeping temperature on the antioxidant capacities of GT with Bland-Altman analysis.



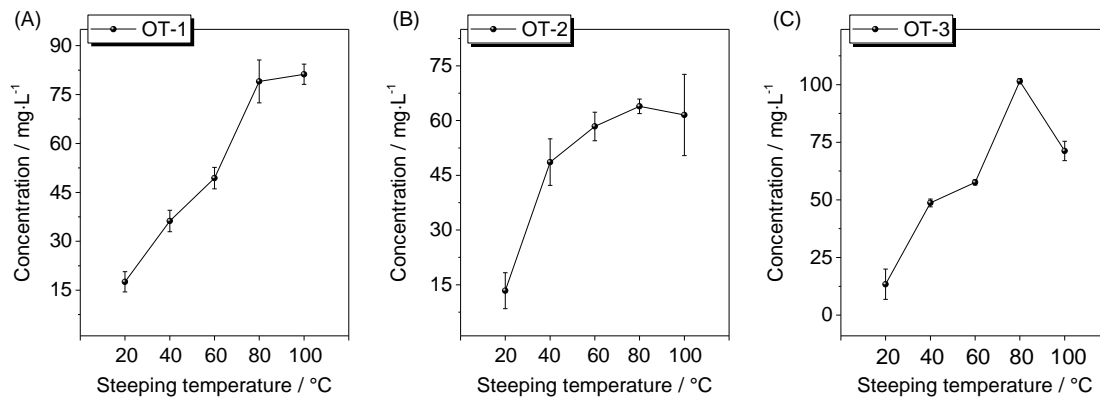

**Figure S37.** Effect of steeping temperature on antioxidants capacities of each of the three Oolong Teas (OT).

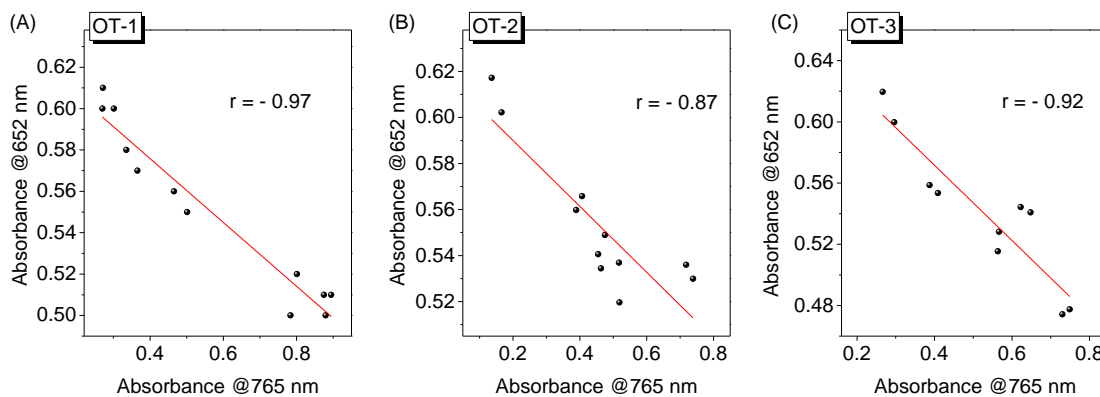

**Figure S38.** The results of this method and the Folin-Ciocalteu method for the analysis of the effect of steeping temperature on the antioxidant capacities of OT with Bland-Altman analysis.

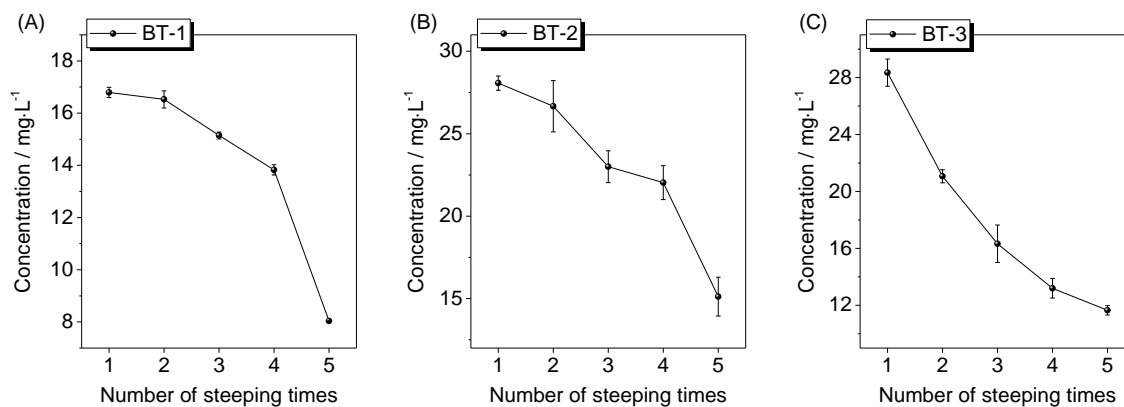

**Figure S39.** Effect of steeping times on antioxidants capacities of each of the three Black Teas (BT).

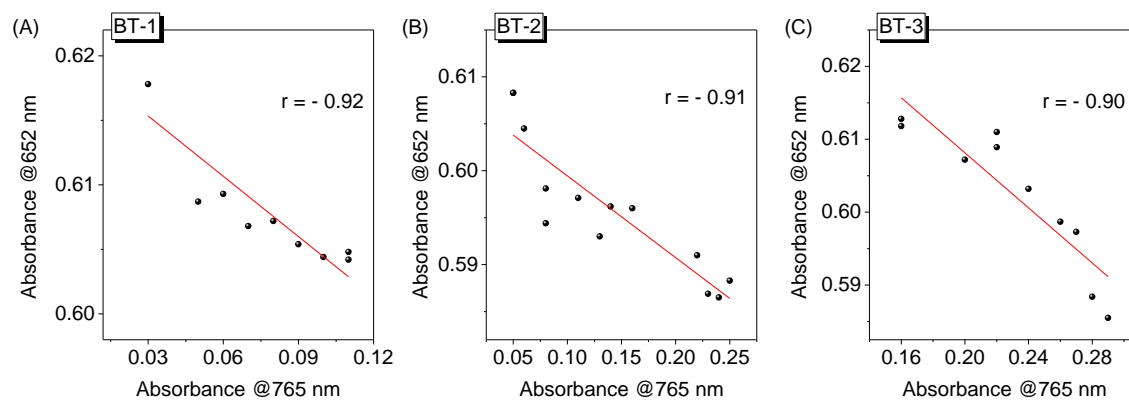

**Figure S40.** The results of this method and the Folin-Ciocalteu method for the analysis of the effect of steeping times on the antioxidant capacities of BT with Bland-Altman analysis.

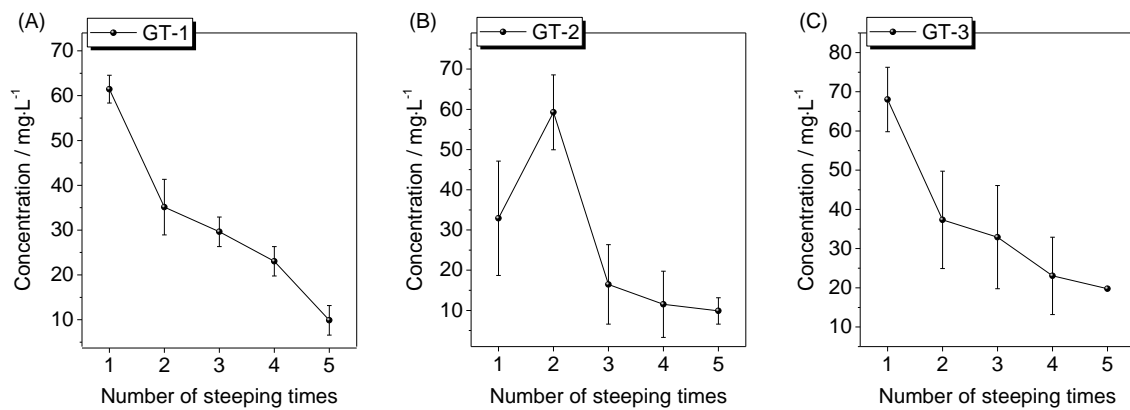

**Figure S41.** Effect of steeping times on antioxidants capacities of each of the three Green Teas (GT).

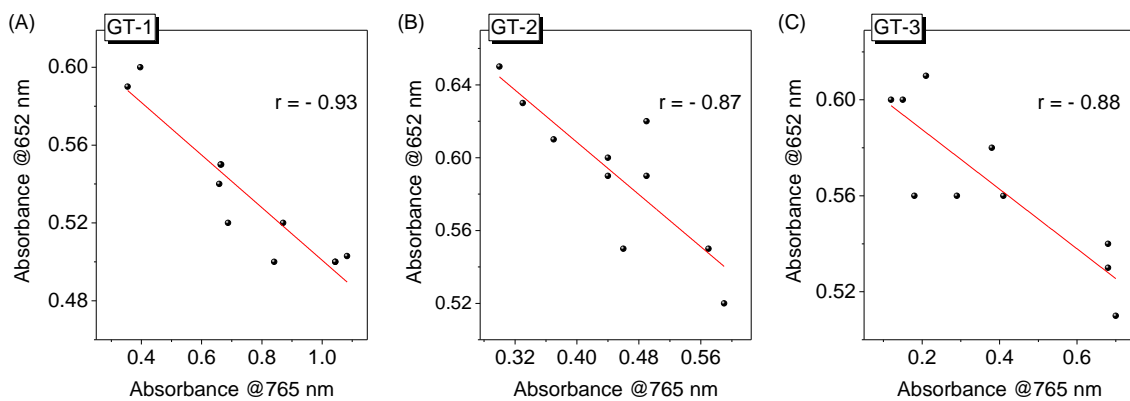

**Figure S42.** The results of this method and the Folin-Ciocalteu method for the analysis of the effect of steeping times on the antioxidant capacities of GT with Bland-Altman analysis.

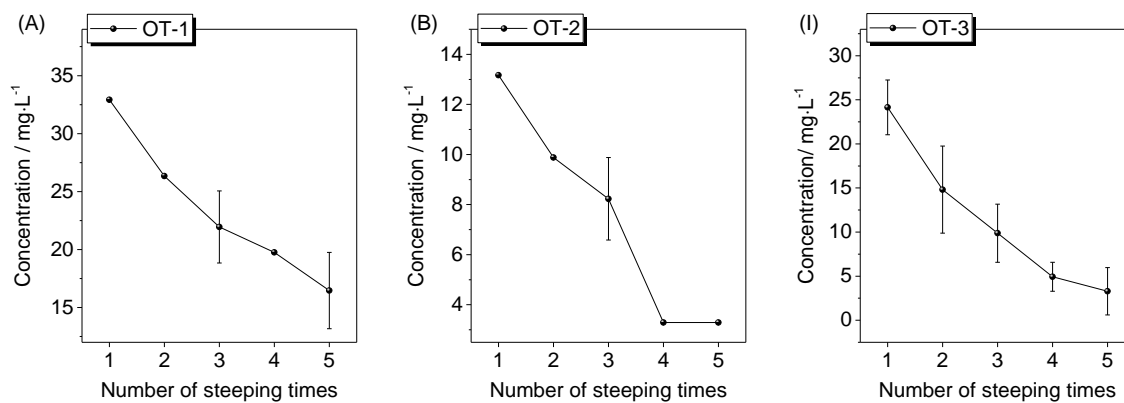

**Figure S43.** Effect of steeping times on antioxidants capacities of each of the three Oolong Teas (OT).

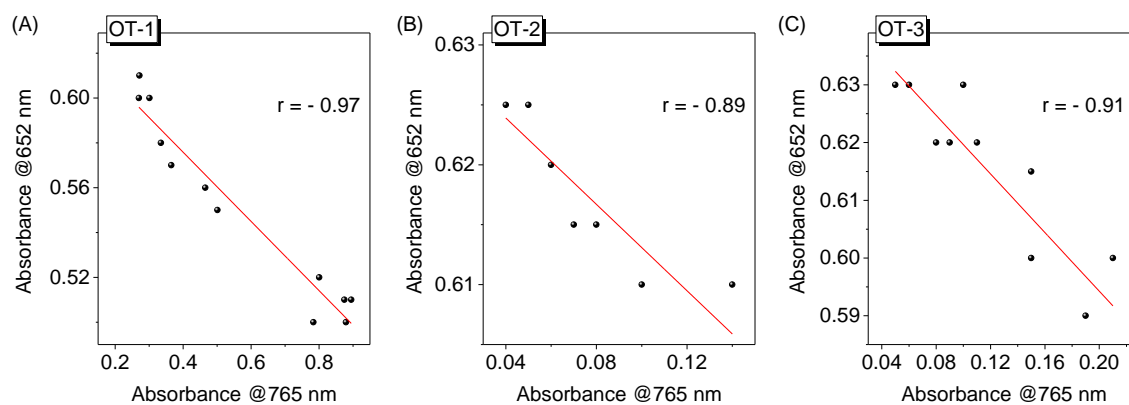

**Figure S44.** The results of this method and the Folin-Ciocalteu method for the analysis of the effect of steeping times on the antioxidant capacities of OT with Bland-Altman analysis.

**Table S5.** Effect of steeping temperature on antioxidants capacities of teas as found with our method and the Folin–Ciocalteu method.

| Samples | Colorimetric at neutral pH (mg L <sup>-1</sup> ) |              |               |               |               | Folin-Ciocalteu method (mg L <sup>-1</sup> ) |              |              |               |               | r             |        |
|---------|--------------------------------------------------|--------------|---------------|---------------|---------------|----------------------------------------------|--------------|--------------|---------------|---------------|---------------|--------|
|         | Temperature (°C)                                 | 20           | 40            | 60            | 80            | 100                                          | 20           | 40           | 60            | 80            |               | 100    |
| BT1     |                                                  | 12.50 ± 3.88 | 23.38 ± 0.99  | 50.48 ± 0.31  | 61.24         | 57.01 ± 6.30                                 | 12.80 ± 0.29 | 23.55 ± 0.35 | 30.93 ± 0.33  | 51.05 ± 0.35  | 51.20 ± 0.36  | - 0.91 |
| BT2     |                                                  | 48.07 ± 0.66 | 63.54 ± 1.65  | 64.86 ± 10.86 | 100.08 ± 3.22 | 58.38 ± 0.82                                 | 36.75 ± 0.15 | 46.00 ± 0.10 | 61.30 ± 0.10  | 97.83 ± 0.74  | 71.03 ± 0.38  | - 0.86 |
| BT3     |                                                  | 39.73 ± 2.42 | 80.33 ± 11.19 | 89.22 ± 16.13 | 96.79 ± 1.98  | 155.07 ± 0.27                                | 28.87 ± 0.40 | 46.65 ± 0.35 | 60.80 ± 0.60  | 86.55 ± 0.15  | 90.90 ± 0.71  | - 0.90 |
| GT1     |                                                  | 23.05 ± 3.29 | 55.97 ± 3.29  | 62.55 ± 9.88  | 84.94 ± 0.93  | 79.02 ± 6.58                                 | 35.54 ± 2.08 | 63.18 ± 0.31 | 64.57 ± 1.22  | 102.69 ± 1.85 | 82.60 ± 8.94  | - 0.93 |
| GT2     |                                                  | 42.80 ± 3.29 | 69.14 ± 9.88  | 88.89 ± 3.29  | 102.06 ± 3.29 | 114.13 ± 13.53                               | 51.22 ± 1.65 | 80.88 ± 1.36 | 106.17 ± 0.54 | 137.81 ± 0.09 | 148.62 ± 0.48 | - 0.92 |
| GT3     |                                                  | 39.51 ± 6.58 | 49.38 ± 9.88  | 95.47 ± 3.29  | 102.06 ± 9.88 | 108.65 ± 3.29                                | 28.26 ± 0.13 | 74.73 ± 0.76 | 122.22 ± 0.29 | 140.86 ± 1.11 | 150.22 ± 0.49 | - 0.94 |
| OT1     |                                                  | 17.56 ± 3.10 | 36.22 ± 3.29  | 49.38 ± 3.29  | 79.00 ± 6.58  | 81.21 ± 3.10                                 | 25.10 ± 1.43 | 38.82 ± 1.53 | 60.32 ± 1.79  | 76.23 ± 0.86  | 85.31 ± 0.86  | - 0.97 |
| OT2     |                                                  | 13.37 ± 4.94 | 48.62 ± 6.38  | 58.41 ± 3.91  | 63.90 ± 2.01  | 61.53 ± 11.16                                | 12.11 ± 1.48 | 36.69 ± 0.75 | 43.48 ± 0.83  | 69.89 ± 1.03  | 48.81 ± 0.07  | - 0.87 |
| OT3     |                                                  | 13.40 ± 6.55 | 48.69 ± 1.68  | 57.58 ± 1.15  | 101.50 ± 1.09 | 71.25 ± 4.21                                 | 25.14 ± 1.49 | 36.81 ± 1.07 | 60.53 ± 1.28  | 70.96 ± 0.95  | 53.51 ± 0.17  | - 0.92 |

**Table S6.** Effect of steeping times on antioxidants capacities of teas as found with our method and the Folin–Ciocalteu method.

| Samples | Colorimetric at neutral pH (mg L <sup>-1</sup> ) |               |               |              |              | Folin-Ciocalteu method (mg L <sup>-1</sup> ) |              |              |              |              | r      |
|---------|--------------------------------------------------|---------------|---------------|--------------|--------------|----------------------------------------------|--------------|--------------|--------------|--------------|--------|
|         | Steeping times                                   | 1             | 2             | 3            | 4            | 5                                            | 1            | 2            | 3            | 4            |        |
| BT1     | 16.79 ± 0.20                                     | 16.53 ± 0.33  | 15.14 ± 0.13  | 13.83 ± 0.20 | 8.03         | 7.50 ± 0.50                                  | 5.50 ± 0.50  | 3.50 ± 0.50  | 2.50 ± 0.50  | 0.50 ± 0.50  | - 0.92 |
| BT2     | 28.07 ± 0.43                                     | 26.67 ± 1.55  | 23.00 ± 0.96  | 22.03 ± 1.03 | 15.12 ± 1.18 | 20.67 ± 0.94                                 | 19.67 ± 0.94 | 11.33 ± 1.25 | 6.00 ± 1.41  | 2.33 ± 0.47  | - 0.91 |
| BT3     | 28.35 ± 0.95                                     | 21.07 ± 0.46  | 16.33 ± 1.32  | 13.20 ± 0.69 | 11.65 ± 0.33 | 25.50 ± 0.50                                 | 23.50 ± 0.50 | 19.00 ± 2.00 | 19.00        | 13.00        | - 0.90 |
| GT1     | 61.46 ± 3.10                                     | 35.12 ± 6.28  | 29.63 ± 3.29  | 23.05 ± 3.29 | 9.88 ± 3.29  | 61.46 ± 0.94                                 | 37.67 ± 0.94 | 23.00        | 15.00        | 12.00 ± 1.00 | - 0.93 |
| GT2     | 32.92 ± 14.22                                    | 59.26 ± 9.13  | 16.46 ± 9.88  | 11.52 ± 8.23 | 9.88 ± 3.29  | 41.67 ± 0.94                                 | 54.67 ± 0.94 | 46.00        | 34.00        | 28.50 ± 1.50 | - 0.87 |
| GT3     | 68.04 ± 8.21                                     | 37.31 ± 12.42 | 32.92 ± 13.17 | 23.05 ± 9.88 | 19.76        | 65.67 ± 0.94                                 | 36.50 ± 1.50 | 27.50 ± 1.50 | 16.00 ± 1.41 | 10.00 ± 1.41 | - 0.88 |
| OT1     | 32.92                                            | 26.34         | 21.95 ± 3.10  | 19.75        | 16.46 ± 3.29 | 28.67 ± 0.94                                 | 22.00        | 13.00 ± 1.41 | 8.33 ± 1.89  | 8.00 ± 1.00  | - 0.97 |
| OT2     | 13.17                                            | 9.88          | 8.23 ± 1.65   | 3.29         | 3.29         | 9.00 ± 2.00                                  | 4.50 ± 0.50  | 3.50 ± 0.50  | 2.00         | 1.00         | - 0.89 |
| OT3     | 24.14 ± 3.10                                     | 14.82 ± 4.94  | 9.87 ± 3.29   | 4.94 ± 1.65  | 3.29 ± 2.67  | 16.67 ± 0.94                                 | 12.00        | 7.00 ± 1.00  | 6.50 ± 0.50  | 3.33 ± 1.25  | - 0.91 |

## References

- 1 J. Y. Zhang, S. H. Wu, X. M. Lu, P. Wu and J. W. Liu, *Nano Lett.*, 2019, **19**, 3214.
- 2 S. H. Wu, R. H. Zhou, H. J. Chen, J. Y. Zhang and P. Wu, *Nanoscale*, 2020, **12**, 5543.
- 3 S. C. Yan, Z. S. Li and Z. G. Zou, *Langmuir*, 2009, **25**, 10397.
- 4 S. Tonda, S. Kumar, S. Kandula and V. Shanker, *J. Mater. Chem. A*, 2014, **2**, 6772.
- 5 F. Nichols, J. E. Lu, R. Mercado, R. Dudschus, F. Bridges and S. W. Chen, *Chem. Eur. J.*, 2020, **26**, 4136.
